# Optimal Therapy Scheduling Based on a Pair of Collaterally Sensitive Drugs

Nara Yoon, Robert Vander Velde, Andriy Marusyk and Jacob G. Scott

October 2, 2017

## Abstract

Despite major strides in the treatment of cancer, the development of drug resistance remains a major hurdle. To address this issue, researchers have proposed sequential drug therapies with which the resistance developed by a previous drug can be relieved by the next one, a concept called collateral sensitivity. The optimal times of these switches, however, remains unknown.

We therefore developed a dynamical model and study the effect of sequential therapy on heterogeneous tumors comprised of resistant and sensitivity cells. A pair of drugs (*DrugA*, *DrugB*) are utilized and switched in turn within the therapy schedule. Assuming that they are collaterally sensitive to each other, we classified cancer cells into two groups, and explored their population dynamics:  $A_R$  and  $B_R$ , each of which is subpopulation of cells resistant to the indicated drug and concurrently sensitive to the other.

Based on a system of ordinary differential equations for  $A_R$  and  $B_R$ , we determined that the optimal treatment strategy consists of two stages: initial stage in which a chosen better drug is utilised until a specific time point,  $T$ , and afterward; a combination of the two drugs with relative durations (i.e.  $f\Delta t$ -long for *DrugA* and  $(1 - f)\Delta t$ -long for *DrugB* with  $0 \leq f \leq 1$  and  $\Delta t \geq 0$ ). Of note, we prove that the initial period, in which the first drug is administered,  $T$ , is shorter than the period in which it remains effective in lowering total population, contrary to current clinical intuition.

We further analyzed the relationship between population makeup,  $ApB = A_R/B_R$ , and effect of each drug. We determine a specific makeup,  $ApB^*$ , at which the two drugs are equally effective. While the optimal strategy is applied,  $ApB$  is changing monotonically to  $ApB^*$  and then remains at  $ApB^*$  thereafter.

Beyond our analytic results, we explored an individual based stochastic model and presented the distribution of extinction times for the classes of solutions found. Taken together, our results suggest opportunities to improve therapy scheduling in clinical oncology.

## 1 Introduction

Drug resistance is observed in many patients after exposure to cancer therapy, and is a major hurdle in the cancer therapy [1]. Treatment with appropriate chemo- or targeted therapy reliably reduces tumor burden upon initiation. However, resistance inevitably arises, and disease burden relapse [2]. The disease recurrence is visible, at the earliest, when disease burden reaches a threshold of detection, at which first therapy is considered failed and a second line drug is used, to control the disease

36 in more efficient way (see Figure 1 (a)). Redesign of treatment is required to start earlier than the  
 37 time point, not only because the detection threshold is higher than the minimum disease burden,  
 38 but also because first drug could become less efficient as duration of therapy reaches to  $T_{max}$ . In  
 39 this research, we focus on the latter reason and figure out how much earlier we should switch drug  
 40 in advance of  $T_{max}$ , assuming that the former reason is less important ( $t_{DT} - t_o \approx T_{max}$ ).

41  
 42 In preexisting tumor, both resistant and sensitive types of cells against a therapy are thought  
 43 to co-exist even before the beginning of the therapy [3], and the cellular composition is shaped  
 44 according to choices of drugs (diagrammed at Figure 1 (b)). Such alteration of cell populations is  
 45 toward gaining resistant properties against the drug being administered, due to (i) kinetic changes  
 46 affecting DNA synthesis during S-phase [4], (ii) drug induced genetic (point) mutations [5], or  
 47 (iii) phenotypic plasticity and resulting epigenetic modifications [6].

48  
 49 To deal with the resistance developed by a drug, one can prescribe a different drug as a follow-  
 50 up therapy targeting the resistance issue. Researchers have sought specific combinations that induce  
 51 sensitivity, this is the concept of collateral sensitivity [7, 8, 9]. In specific cases, an order of several  
 52 drugs complete a collateral sensitivity cycle [8], and corresponding periodic drug sequence can be  
 53 used in prescription of a long term therapy – though we recently showed that the continued effi-  
 54 cacy of the same cycle is not guaranteed [10]. In this research, we focused on such drug cycling  
 55 comprised by just two drugs, each of which can be used as a targeted therapy treating non-cross  
 56 resistant factors occurring after the therapy of the other drug (diagrammed on Figure 1 (b)).

57

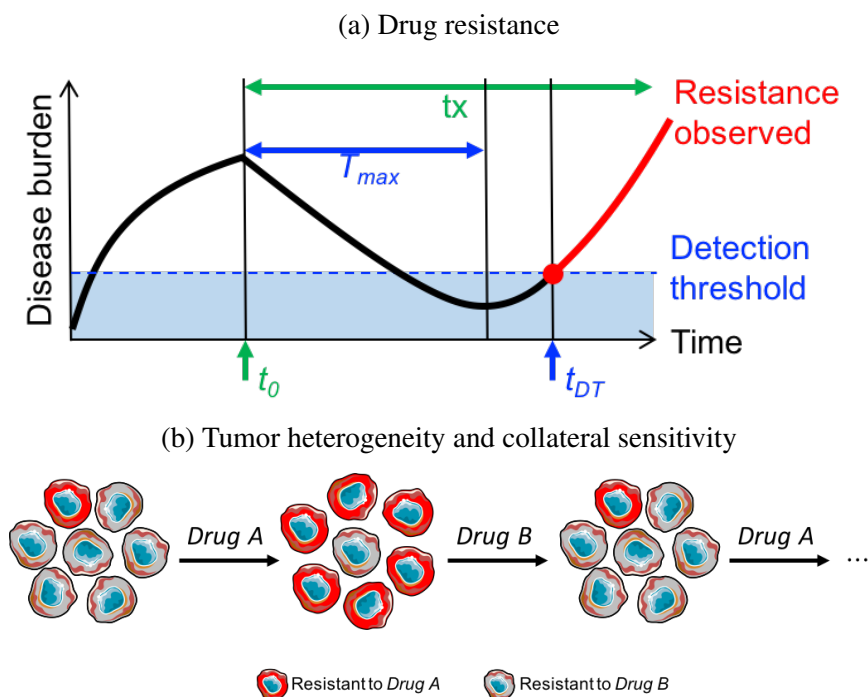

Figure 1: (a) General dynamical pattern of disease burden. It increases initially and then decreases as of the therapy starting point ( $t_0$ ), and eventually rebounds after the maximum period with positive therapy effect ( $T_{max}$ ). Relapse is found, at the earliest, when disease burden reaches detection threshold at  $t_{DT}$ . (b) Change in composition of tumor cell population when a pair of collaterally sensitive drugs are given one after another.

58 The underlying dynamics of resistance development has been studied by looking cell popula-

59 tions mixed by sensitive and resistant types against therapy/therapies, whether it is genotypic or  
 60 phenotypic classifications [11]. Additionally, many researchers have accounted for their choices of  
 61 detailed cellular heterogeneities like: (i) stages in evolutionary structures [12, 13], (ii) phases of  
 62 cell cycle [14, 15, 16, 17], or (iii) spatial distribution of irregular therapy effect [18, 19]. Among  
 63 them, many researches (including [11, 15, 16, 20]) studied the effect of a pair of non-cross resistant  
 64 drugs like us, using the Goldie-Coldman model or its variations [12, 21, 22]. Those models are ba-  
 65 sically utilizing population structure of four compartments each of which represents subpopulation  
 66 (i) sensitive to the both drugs, (ii) and (iii) resistant to one of them respectively, or (iv) resistant to  
 67 both.

68  
 69 In this research, we want to propose a simpler modeling structure including only two types  
 70 of subpopulations (see Section 2 for the detail), which is still appropriate in the study of collater-  
 71 ally sensitive drug effect and whose simplicity facilitates mathematical derivations of interesting  
 72 concepts and quantities (see Section 3 for the detail of the analytical derivations). The model we  
 73 propose at Section 2 has a potential to be expanded with other important considerations as well,  
 74 like comparable stochastic simulations described in Section 4 and other future works explained in  
 75 Section 5.

## 76 2 Modeling setup

### 77 2.1 Basic cell population dynamics under a single drug administration

78 Before describing the comprehensive model for collateral sensitive network in Section 2.2, let us  
 79 go over a fundamental modeling structure describing dynamical behavior of cell populations under  
 80 a single drug. Based on the sensitivity and resistance to the therapy, cell population can be split  
 81 into two groups. Then, we call the populations of the sensitive cells and the resistant cells by  $C_S$   
 82 and  $C_R$  respectively, and use total cell population,  $C_P = C_S + C_R$ , in measuring disease burden  
 83 and drug effect.

84  
 85 We account three dynamical events in our model: proliferation of sensitive ( $s$ ) and resistant  
 86 cells ( $r$ ), and transition between the cell types ( $g$ ). Here, net proliferation rate represents combined  
 87 birth and death rate, so can be positive if birth rate is higher than death rate or negative otherwise. It  
 88 is reasonable to assume that, under the presence of drug, sensitive cell population declines ( $s < 0$ ),  
 89 resistant cell population increases ( $r > 0$ ), and  $g > 0$  for transition.

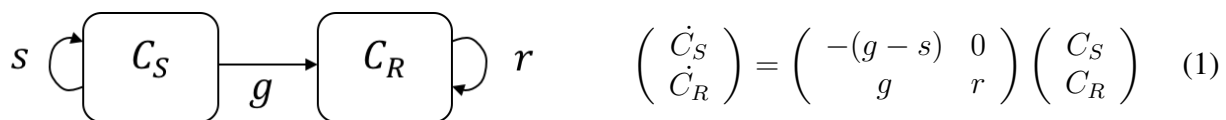

Figure 2: Diagram of dynamics between sensitive cells population,  $C_S$ , and resistant cells population,  $C_R$ , (on the left panel) and the differential system of  $\{C_S, C_R\}$  (on the right panel) with  $s$ —proliferation rate of sensitive cells,  $r$ —proliferation rate of resistant cells,  $g$ —transition rate from  $C_S$  to  $C_R$

91 Figure 2 shows the diagrams of such population dynamics, and the system of ordinary differen-  
 92 tial equations that  $\{C_S, C_R\}$  obey. The solution of the system (1) is

$$\begin{pmatrix} C_S(t) \\ C_R(t) \end{pmatrix} = \begin{pmatrix} e^{-(g-s)t} & 0 \\ \frac{g(e^{rt} - e^{-(g-s)t})}{g+r-s} & e^{rt} \end{pmatrix} \begin{pmatrix} C_S^0 \\ C_R^0 \end{pmatrix} \quad (2)$$

93 where  $\{C_S(0), C_R(0)\} = \{C_S^0, C_R^0\}$ . By (2), total population is

$$C_P(t) = \left( \frac{r-s}{g+r-s} C_S^0 \right) e^{-(g-s)t} + \left( \frac{g(C_S^0 + C_R^0) + (r-s)C_R^0}{g+r-s} \right) e^{rt}. \quad (3)$$

95  
96  
97  $C_P(t)$  is a positive function comprised of a linear combination of exponential growth ( $e^{rt}$ ) and  
98 exponential decay ( $e^{-(g-s)t}$ ) with positive coefficients. Despite the limitations of simple expo-  
99 nential growth models [23], we feel it is a reasonable place to start, since the relapse of tumor size  
100 starts when it is much smaller than its carrying capacity which results in almost exponential growth.

101  
102  $C_P$  has one and only one minimum point in  $\{-\infty, \infty\}$ , after which  $C_P$  increases monotonically.  
103 If  $C'_P(0) = sC_S^0 + rC_R^0 \geq 0$ , the drug is inefficient. ( $C_P(t)$  is increasing on  $t \geq 0$ , see an example  
104 on Figure 3 (a)) Otherwise, if  $C'_P(0) < 0$ , the drug is effective in reducing tumor burden at the  
105 beginning, although it will eventually regrow (drug resistance; see an example on Figure 3 (b)).

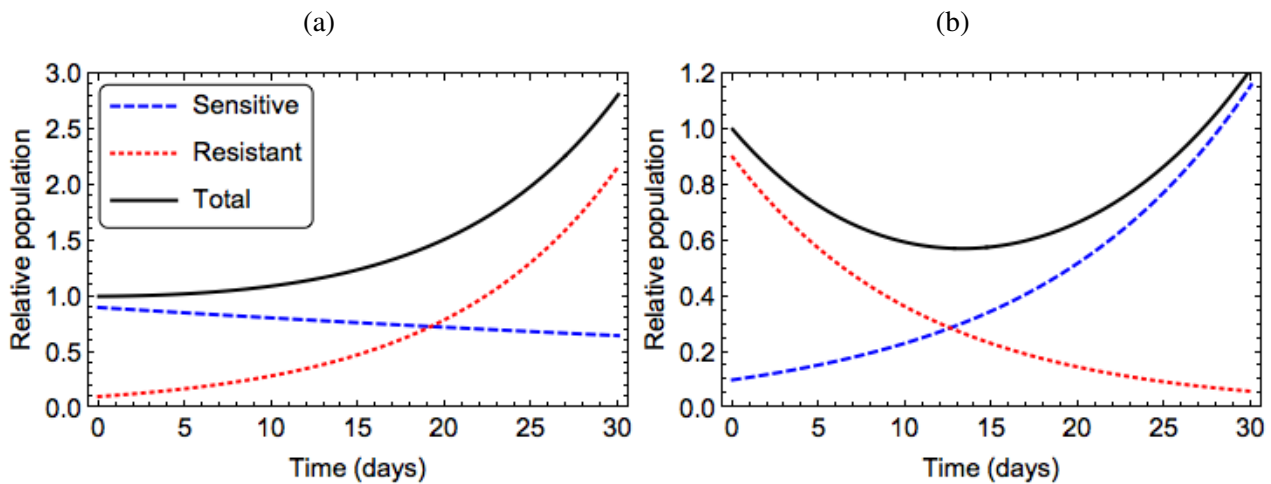

Figure 3: Representative population histories of sensitive and resistant cells and their summation with initial population makeup,  $\{C_S^0, C_R^0\} = \{0.9, 0.1\}$ . (a) increasing total population with  $\{s, r, g\} = \{-0.01, 0.1, 0.001\}$ ;  $C'_P(0) = 0.001 > 0$ . (b) rebounding total population with  $\{s, r, g\} = \{-0.09, 0.08, 0.001\}$ ;  $C'_P(0) = -0.073 < 0$ .

## 106 2.2 Cell population dynamics with a pair of collateral sensitivity drugs

107 Here, we describe the effect of a combined therapy with two drugs switched in turn, by extending  
108 the model for a single-drug administration (System (1)). Assuming that the drugs are collaterally  
109 sensitive to each other, cell population is classified into just two groups reacting to the two types  
110 of drugs in opposite ways. Depending on which drug to be administered, cells in the two groups  
111 will have different proliferation rates and direction of cell-type transition (see Figure 4). That is,  
112 the population dynamics of the two groups follow a piecewise continuous differential system con-  
113 sisting of a series of the system (1), each of which is assigned on a time slot bounded by times of

114 drug-switch.

115

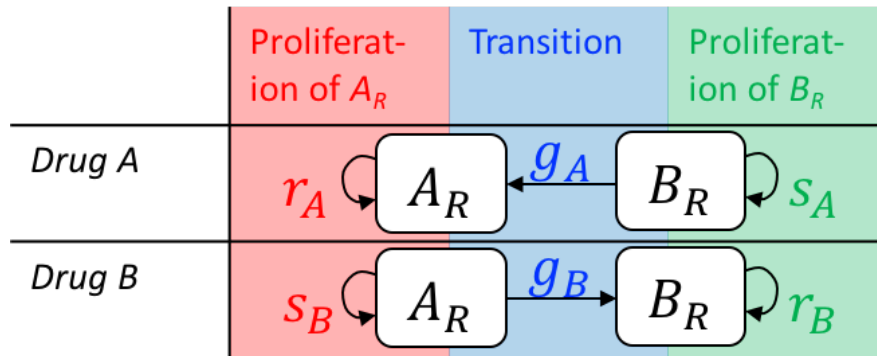

Figure 4: Population dynamics between  $A_R$ – population of cells resistant only to *DrugA* and  $B_R$ – population of cells resistant only to *DrugB* under the presence of *DrugA*, or *DrugB*. For each drug therapy, three drug-parameters of proliferations (colored red and green) and transition (colored blue) are involved.

116 In summary, we assume that

- 117 • there is a pair of collaterally sensitive drugs, *DrugA* and *DrugB*, which are characterized
- 118 by their own model parameters,  $p_A = \{s_A, r_A, g_A\}$  and  $p_B = \{s_B, r_B, g_B\}$  respectively,
- 119 • cell population can be split into two subpopulations,  $A_R$  - resistant to *DrugA* and at the same
- 120 time sensitive to *DrugB*, and  $B_R$  - resistant to *DrugB* and sensitive to *DrugA*, and
- 121 • three types of factors determine the dynamical patterns, (i) drug parameters,  $\{p_A, p_B\}$ , (ii)
- 122 initial population ratio  $ApB_0 = A_R(0)/B_R(0)$  (assuming that  $A_R(0) + B_R(0) = 1$ ), and (iii)
- 123 drug switch schedule.

124 An example of histories of  $\{A_R, B_R, A_R + B_R\}$  with a choice of the three factors is shown at

125 Figure 5.

## 126 3 Analysis on therapy scheduling

### 127 3.1 Drug-switch timing

128 We explored possible strategies on choosing drug switch timing within our modeling setup. The

129 first idea is relevant to clinical intuition: switching drug at the global minimum point of tumor size

130 ( $T_{max}$ ; see Figure 1 (a)), which is shown to exist uniquely in the previous section if and only if

131  $C_R(0)/C_S(0) < -s/r$ . The expression of  $T_{max}$  derived from our model is

$$T_{max}(\{s, r, g\}, RpS_0) = \frac{\ln \left[ \frac{(g-s)(r-s)}{r(g(RpS_0+1) + RpS_0(r-s))} \right]}{g+r-s} \quad \text{with } RpS_0 = \frac{C_R(0)}{C_S(0)}. \quad (4)$$

132  $T_{max}$  depends on (i) the parameters of drug being administered, and (ii) initial population makeup.

133 In the *DrugA*-based therapy, it is  $T_{max}(p_A, ApB_0)$ , and in the *DrugB*-based therapy, it is  $T_{max}(p_B, 1/ApB_0)$ .

134

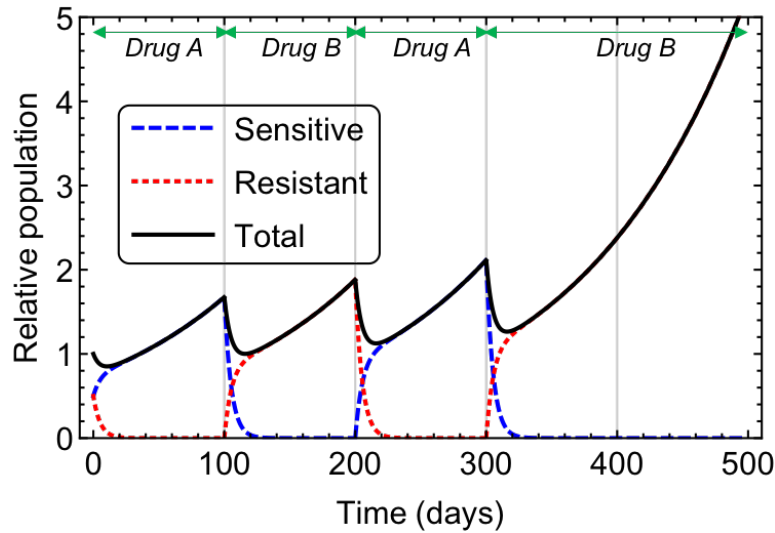

Figure 5: Representative plots describing dynamics during drug switches (blue -  $A_R$ , yellow -  $B_R$ , green -  $(A_R + B_R)$ ). Here,  $p_A = p_B = \{-0.9, 0.08, 0.1\}/\text{day}$  and  $\{A_R^0, B_R^0\} = \{0.5, 0.5\}$ .

135 In addition to  $T_{max}$ , another time point with significant meaning is  $T_{min}$ , explained below. Since  
 136 the decreasing rate is almost zero around  $T_{max}$  with no switch (see the black curve of Figure 5), we  
 137 seek to find a way to expedite the decreasing rate by switching drug before  $T_{max}$ . To decide how  
 138 much earlier to do so, we compared the derivative of  $A_R + B_R$  under constant selective pressure  
 139 (no switch) at an arbitrary time point,  $t_1$ , and compared it to the right derivative of  $A_R + B_R$   
 140 with the drug-switch assigned at  $t_1$ . For example, if the first drug is *DrugA* and the follow-up drug is  
 141 *DrugB*, we compared

$$142 \quad C'_P(t_1 \text{ given } \{s, r, g\} = p_A \text{ and } \{C_S^0, C_R^0\} = \{B_R(t_1), A_R(t_1)\}) \text{ from (3),}$$

143 and

$$144 \quad C'_P(t_1 \text{ given } \{s, r, g\} = p_B \text{ and } \{C_S^0, C_R^0\} = \{A_R(t_1), B_R(t_1)\}) \text{ also from (3).}$$

145 This comparison reveals that the two derivatives are equal at a specific point (this is  $T_{min}$ , see the  
 146 yellow curve on Figure 6), the derivative of drug-switch is lower (higher in absolute value; higher  
 147 decreasing rate) if  $t_1 > T_{min}$  (see the blue and green curves on Figure 6), and the derivative of  
 148 no-switch is lower if  $t_1 < T_{min}$  (see the red curve on Figure 6).

149  
 150  $T_{min}$  depends on the parameters for the first drug  $\{s_1, r_1, g_1\}$  and for the second drug  $\{s_2, r_2\}$ ,  
 151 and initial population ratio between resistant cells and sensitive cells for the first drug  $RpS_0$ . Here,  
 152 transition parameter of second drug ( $g_2$ ), and respective values of the two populations are unneces-  
 153 sary in the evaluation of  $T_{min}$ , which is found to be

$$T_{min}(\{s_1, r_1, g_1\}, \{s_2, r_2\}, RpS_0) = \frac{\ln \left[ \frac{(r_1 - s_1)(r_2 - s_1) + g_1(r_1 + r_2 - s_1 - s_2)}{(r_1 - s_2)(g_1 + RpS_0(g_1 + r_1 - s_1))} \right]}{g_1 + r_1 - s_1}. \quad (5)$$

154 In *DrugA-to-DrugB* switch, it is  $T_{min}(p_A, p_B, ApB_0)$ , and in *DrugB-to-DrugA* switch, it is  
 155  $T_{min}(p_B, p_A, 1/ApB_0)$ .

156



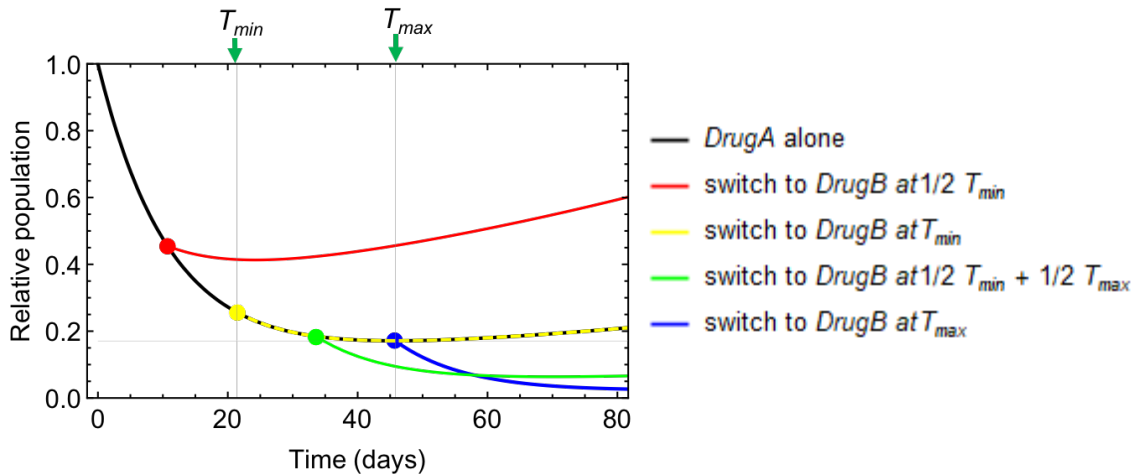

Figure 6: Comparison of total population curves with one-time drug-switch from *DrugA* to *DrugB* at different time points, (i) at  $< T_{min}$  (worse than without-switch; red curve), (ii) at  $T_{min}$  (same as without-switch; yellow curve), (iii) between  $T_{min}$  and  $T_{max}$  (better than without-switch; green curve), and (iv)  $T_{max}$  (better than without-switch; blue curve). Each color of dot/curve represents cell population level on and after drug-switch of each switching strategy. The dashed curve mixed by yellow and black colors represent the yellow and black curves overlapped. Parameters:  $p_A = p_B = \{-0.9, 0.08, 0.001\}/\text{day}$  and  $\{A_R^0, B_R^0\} = \{0.1, 0.9\}$ .

157 An important issue observed in Figure 6 is that the population curve with only one-time drug-  
 158 switch after  $T_{min}$  (and before  $T_{max}$ , assuming that  $T_{min} < T_{max}$ ) is not guaranteed to be lower  
 159 than that of one-time switch at  $T_{max}$  over an entire time range. (i.e., the green curve relevant to the  
 160 switch at  $(T_{min} + T_{max})/2$  and the blue curve relevant to the switch at  $T_{max}$  intersect at  $t \approx 58$   
 161 and the blue curve is lower after the time of the intersection). However, sequential drug switches started  
 162 between  $T_{min}$  and  $T_{max}$  leave a possibility of finding a better drug schedule than the  $T_{max}$ -based  
 163 strategy. Figure 7 shows possible choices of follow up switches (green and black curves) which  
 164 achieve better results than  $T_{max}$ -switch (red curves), unlike the drug-switches started before  $T_{min}$   
 165 remaining less effective (magenta curve).

166  
 167 Optimal drug switch scheme will be discussed in detail in Section 4.2. The optimal scheduling  
 168 for the example of Figure 5 starts with the first drug until  $T_{min}$  (blue curve for  $0 < t \leq T_{min}$ )  
 169 followed by rapid exchange of the two drugs afterward (black curve for  $t > T_{min}$ ). Switching  
 170 before  $T_{max}$ , that is, before the drug has had its full effect, goes somewhat against clinical intuition,  
 171 and is therefore an opportunity for unrealized clinical improvement based on a rationally scheduled  
 172 switch at  $T_{min}$ . In order to realize this however, there are conditions about the order of  $T_{max}$  and  
 173  $T_{min}$  which must be satisfied. In particular:

$$\begin{cases} T_{min} < T_{max} & \text{if and only if } r_{ArB} < s_{ASB} \\ T_{min} = T_{max} & \text{if and only if } r_{ArB} = s_{ASB} \\ T_{min} > T_{max} & \text{if and only if } r_{ArB} > s_{ASB}. \end{cases} \quad (6)$$

174 In our analysis and simulations, we will deal with the cases mostly satisfying  $r_{ArB} < s_{ASB}$ , as  
 175 otherwise we cannot expect improvement of clinical strategy using  $T_{min}$ , and more importantly as  
 176 the choice of drugs not satisfying  $r_{ArB} < s_{ASB}$  is not powerful to reduce cell population (explained  
 177 in detail in the next section and Figure 8).

178

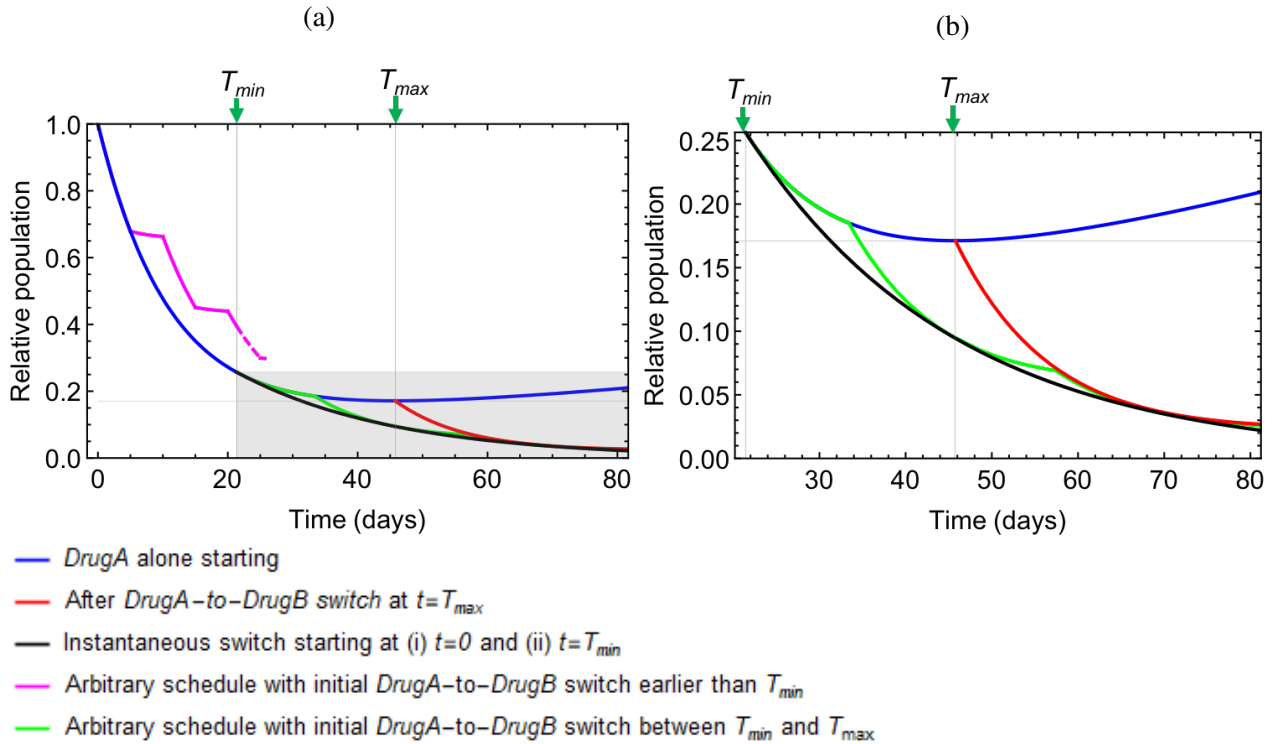

Figure 7: Total population curves with different therapy strategies with  $p_A = p_B = \{-0.9, 0.08, 0.001\}/day$  and  $\{A_R^0, B_R^0\} = \{0.1, 0.9\}$  (a) full range of relative population (b) enlargement of the shaded areas on (a)

179 The difference between  $T_{min}$  and  $T_{max}$  ( $T_{gap}$ ), provides intuition on how much shorter the first  
 180 drug administered than it is used to be.

$$\begin{aligned}
 T_{gap}(\{s_1, r_1, g_1\}, \{s_2, r_2\}) &:= T_{max}(\{s_1, r_1, g_1\}, RpS_0) - T_{min}(\{s_1, r_1, g_1\}, \{s_2, r_2\}, RpS_0) \\
 &= \frac{\ln \left[ \frac{(g_1 - s_1)(r_1 - s_1)(r_1 - s_2)}{r_1((r_1 - s_1)(r_2 - s_1) + g_1(r_1 + r_2 - s_1 - s_2))} \right]}{g_1 + r_1 - s_1} \quad (7)
 \end{aligned}$$

181 We studied sensitivity analysis on  $T_{gap}$  over a reasonable space of non-dimensionalized drug pa-  
 182 rameters in Appendix B. Expectedly, as the proliferation rates under the second drugs increases  
 183 ( $r_2 \uparrow$  and/or  $s_2 \uparrow$ ), the optimal switching timing to the second drug is delayed ( $T_{min} \uparrow$  and  $T_{gap} \downarrow$ ).  
 184 As  $r_1$  increases, both  $T_{min}$  and  $T_{max}$  decrease. However,  $T_{max}$  decrease more than  $T_{min}$  does, so in  
 185 overall  $T_{gap}$  decreases.  $s_1$  and  $T_{gap}$  do not have a monotonic relationship.  $T_{gap}$  is increasing as  $s_1$  is  
 186 increasing in a range of relatively low values, but it turns into decreasing in relatively high values  
 187 of  $s_1$ .

### 188 3.2 Population makeup and drug effect

189 In this section, we study how the degree of cellular heterogeneity and therapy effect are related,  
 190 and checked the roles of  $T_{min}$  and  $T_{max}$  in the relationships. We defined a function of population  
 191 makeup  $ApB$  based on the ratio between the two cell types,

$$192 \quad ApB(t) := \frac{A_R(t)}{B_R(t)}.$$



193 Then, the ratio at  $T_{min}$  with *DrugA*-to-*DrugB* switch ( $T_{min}^A$ ) and with *DrugB*-to-*DrugA* switch  
 194 ( $T_{min}^B$ ) are equivalent.

$$ApB(T_{min}^A) = ApB(T_{min}^B) = \frac{r_B - s_A}{r_A - s_B} := ApB^*. \quad (8)$$

195 At  $T_{max}$  with *DrugA* ( $T_{max}^A$ ), and with *DrugB* ( $T_{max}^B$ ), we have

$$196 \quad ApB(T_{max}^A) = \frac{-s_A}{r_A}, \quad ApB(T_{max}^B) = \frac{r_B}{-s_B},$$

197 And, as  $s < 0$  and  $r > 0$ , those values of  $ApB$  are all positive.

198  
 199 We next consider the level of drug effect at each  $ApB$  by taking the derivative of cell popula-  
 200 tion under the presence of the drug. Fixing the total population, the derivative is defined by  $ApB$   
 201 in addition to the model parameters. We define this effect by

$$202 \quad Ef(ApB) := \left. \frac{d}{dt}(A_R(t) + B_R(t)) \right|_{t=0, ApB_0=ApB}^{p_A \text{ or } p_B} \quad \text{with } A_R(0) + B_R(0) = 1.$$

204 The effects of *DrugA* (specified by  $p_A$ ) and *DrugB* (specified by  $p_B$ ) defined in this way are equiv-  
 205 alent at  $ApB^*$ , by the definitions of  $T_{min}$  and  $ApB^*$ . The effect of *DrugA* is larger if  $ApB < ApB^*$ ,  
 206 since the cell population resistant to *DrugA* is relatively larger than the population of the other cell  
 207 type. Otherwise, *DrugB* has a better effect. At the makeup of  $T_{max}^A$ , *DrugA* has no effect on  
 208 population reduction. If  $ApB$  is getting smaller than that, *DrugA* becomes effective. And, the  
 209 smaller  $ApB$  is, the better effect *DrugA* has. Similarly the effect of Drug B is zero at  $ApB(T_{max}^B)$   
 210 and increases as  $ApB$  increases above  $ApB(T_{max}^B)$  (see Figure 8).

211

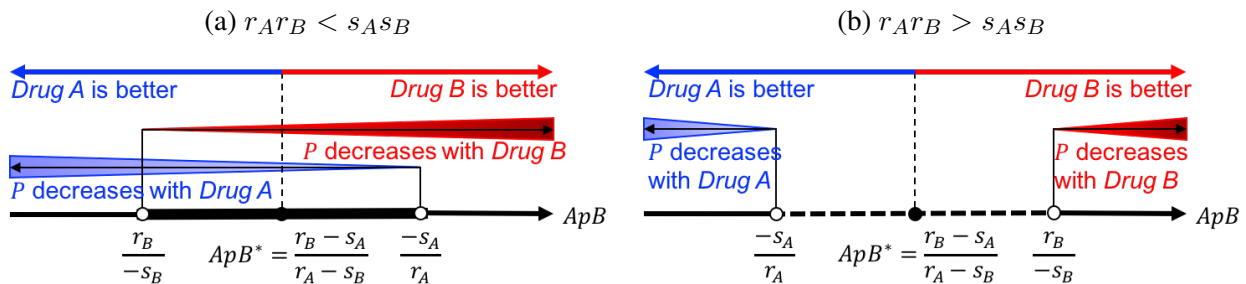

Figure 8: Effect of *DrugA* and *DrugB* over the axis of  $ApB$ . The two drugs have same effect at  $ApB = ApB^*$ , and have no effect at  $ApB = -s_A/r_A$  (in case of *DrugA*) or  $ApB = -r_B/s_B$  (in case of *DrugB*). The drug effect is getting bigger, as  $ApB$  is getting farther from the no-effect level to the direction of getting less cell population resistant to the drug.

212 The population makeup changes in the opposite direction. As *DrugA* (or *DrugB*) therapy  
 213 continues,  $ApB$  continues to increase (or decrease). So, if *DrugA* (or *DrugB*) is given too  
 214 long, it should go through a period of no or almost no effect around  $ApB = -s_A/r_A$  (or around  
 215  $ApB = -r_B/s_B$ ), but once the drug is switched after that, there will be a higher therapy effect with  
 216 *DrugB* (or with *DrugA*). Such two opposite aspect has shown to be balanced by switching drug  
 217 when the population makeup reaches  $ApB^*$ .

218

219 Depending on the condition (6), the order of the three ratios at  $T_{min}$ ,  $T_{min}^A$  and  $T_{max}^B$  changes.  
 220 In particular, if  $r_{A^*}r_B < s_{A^*}s_B$ , there exists an interval of  $ApB$ ,  $(-r_B/s_B, -s_A/r_A)$ , in which  
 221 both drugs are effective in decreasing population, given the condition is satisfied. Otherwise, if  
 222  $r_{A^*}r_B < s_{A^*}s_B$ , no drug is effective when  $ApB \in (-s_A/r_A, -r_B/s_B)$ . These results are schematized in Figure 8.  
 223  
 224

### 225 3.3 Optimal scheduling and its clinical implementation

226 In this sections, we describe a drug-switch strategy to achieve the best effect possible with a pair of  
 227 collaterally sensitive drugs. It is numerically found, and consists of two stages.

- 228 • **(Stage 1)** to reach to the population makeup with balanced drug effect ( $ApB^*$ ), so the period  
 229 lasts as long as  $T_{min}$  of the first drug
- 230 • **(Stage 2)** to give the two drugs with a proper ratio in period (represented by  $k$ ; see Figure  
 231 9) in order to keep  $ApB$  being constant at  $ApB^*$ , and switching them in a high frequency,  
 232 represented by  $\Delta t \approx 0$

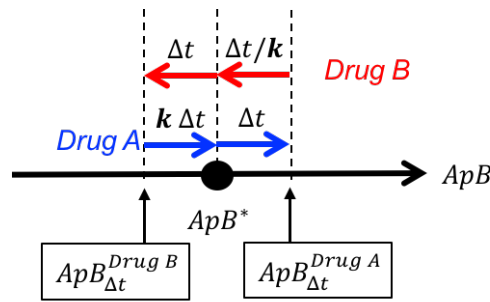

Figure 9: Diagram of the relationship between therapy duration (like  $\Delta t$ ,  $k \Delta t$ , or  $\Delta t/k$ ) and change in  $ApB$  around  $ApB^*$ .  $\Delta t$  represents an arbitrary time interval (supposed to be small,  $\Delta t \approx 0$ ), and  $k$  represents a specific quantity corresponding to such  $\Delta t$  and parameters of  $DrugA$  and  $DrugB$ .

233  $k$  represents relative duration of  $DrugA$  compared to duration of  $DrugB$  in Stage 2. The ex-  
 234 plicit formulation of  $k$  can be derived from the solution of the differential equations (2) by (i) eval-  
 235 uating the level of  $ApB$  after  $\Delta t$ -long  $DrugA$  therapy started with  $ApB(0) = ApB^*$  ( $ApB_{\Delta t}^{DrugA}$ ),  
 236 and then, (ii) by measuring the time period taken to achieve  $ApB^*$  back from  $ApB_{\Delta t}^{DrugA}$  through  
 237  $DrugB$  therapy ( $\Delta t'$ ), and finally (iii) taking ratio between the two therapy periods ( $k = \Delta t/\Delta t'$ ).  
 238 Such  $k$  is consistent to the ratio similarly evaluated with  $DrugB$  as first therapy and  $DrugA$  as  
 239 follow-up therapy.  $k$  depends on drug switch frequency and model parameters,

$$k = k(\Delta t, p_A, p_B). \quad (9)$$

In the optimal case of instantaneous switching,

$$\begin{aligned} k^*(p_A, p_B) &:= \lim_{\Delta t \rightarrow 0} k(\Delta t, p_A, p_B) \\ &= \frac{(r_A - s_B)((r_A - s_A)(r_B - s_A) + g_A(r_A + r_B - s_A - s_B))}{(r_B - s_A)((r_B - s_B)(r_A - s_B) + g_B(r_A + r_B - s_A - s_B))}. \end{aligned} \quad (10)$$

240 We studied how sensitive  $k^*$  (or  $f^* = k^*/(1+k^*)$ ) is over a reasonable range of non-dimentionalized  
 241  $\{p_A, p_B\}$  (see Appendix B for the detail).  $k^*$  (or  $f^*$ ) increases, as  $r_A$  and/or  $s_B$  increases and as  $s_A$

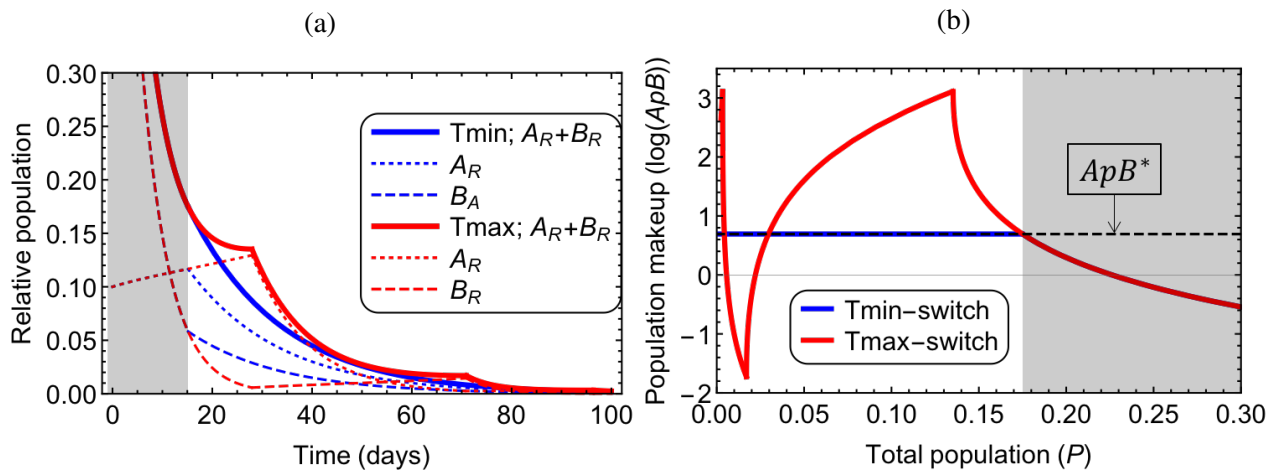

Figure 10: Comparison between dynamical trajectories of the optimal ( $T_{min}$  switch; blue curves) and a non-optimal ( $T_{max}$  switch; red curves) therapeutic strategies. Part of curves over Stage 1 and Stage 2 are drawn in gray and white backgrounds respectively. Parameters/conditions:  $\{s_A, s_B\} = \{-0.18, -0.09\}/\text{day}$ ,  $\{r_A, r_B\} = \{0.008, 0.016\}/\text{day}$ ,  $\{g_A, g_B\} = \{0.00075, 0.00125\}/\text{day}$  and  $\{A_R^0, B_R^0\} = \{0.1, 0.9\}$

242 and/or  $r_B$  increases.

243  
244 Figure 10 shows examples of population curves with the optimal strategy ( $T_{min}$  switch) and  
245 one non-optimal strategy ( $T_{max}$  switch) using the same choice of parameters/conditions. The vi-  
246 sual comparison validates the better effect of the optimal strategy than the other strategy over a  
247 range of time (see Figure 10 (a)). Figure 10 (b) shows the typical pattern of  $ApB$  in the optimal  
248 therapy compared to the other, which is monotonically changing toward  $ApB^*$  in the first stage and  
249 staying still in the second stage.

250  
251 For the sake of practicality of clinical application, instantaneous drug switch in Stage 2 could  
252 be approximated by high frequency switching with  $\Delta t \gtrsim 0$  along with the corresponding  $k(\Delta t)$   
253 from (9), or  $k^*$  (10) independent from  $\Delta t$ . Expectedly, the smaller  $\Delta t$  is chosen, the closer to the  
254 ideal case with  $\Delta t = 0$  (see Appendix C for the details).

255  
256 Additionally, we have proved that the effect of instantaneous drug switch, with an arbitrary  
257 ratio in duration between two drugs ( $k$ ), is consistent to the effect of mixed drug with relative  
258 dosage ratio which is also  $k$  (Theorem A.8 in Appendix). The theorem is used in the derivation  
259 of differential system/solution of optimal strategy (Theorem A.11 in Appendix). According to the  
260 results, in Stage 2 of optimal regimen, all types of populations,  $A_R$ ,  $B_R$  and  $A_R + B_R$ , changes with  
261 same constant proliferation rate,

262

$$\lambda = \frac{r_A r_B - s_A s_B}{r_A + r_B - s_A - s_B}.$$

## 263 4 Stochastic studies on eradication time

264 In previous sections we utilized an entirely deterministic model of cancer. Cancers, however, are  
265 not deterministic, and without stochasticity in our system we could not model an important part  
266 of cancer treatment: extinction. We therefore constructed a simple individual based model using a

267 Gillespie algorithm to study this aspect of cross-sensitivity.

268

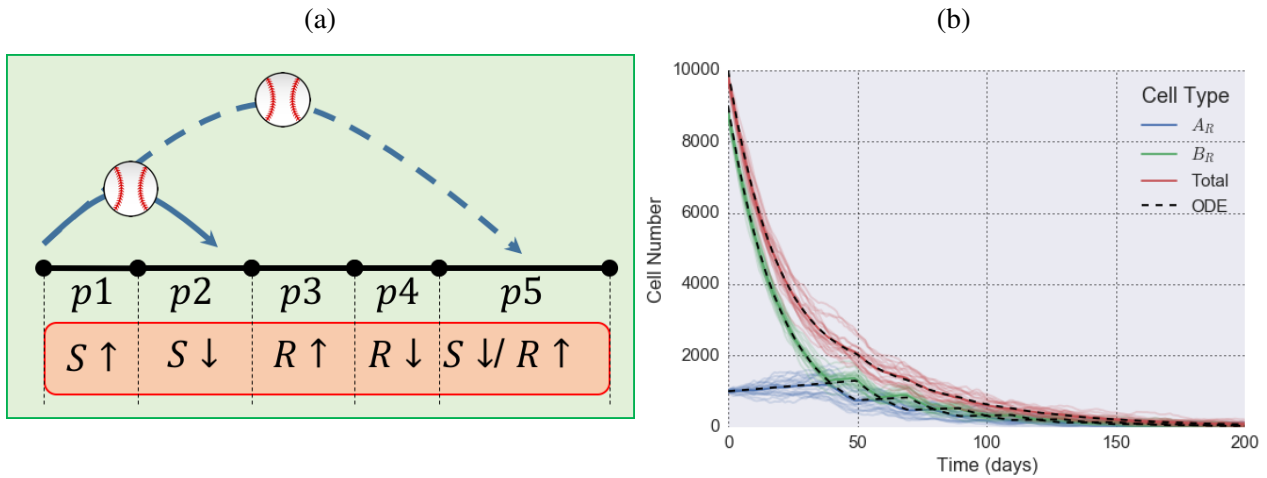

Figure 11: (a) Illustration of possible events and their assignment in the stochastic model. (b) Comparison between the stochastic process and the ODE model. The mean (thick curves) of multiple stochastic simulations (thin curves) are compared to the ODE solution (dashed curves). Parameters are  $\{s_A, r_A, g_A | s_B, r_B, g_B | A_R^0, B_R^0\} \{-0.05, 0.005, 0.0001 | -0.05, 0.005, 0.0001 | 1000, 9000\}$ , birth + death = 1.0.

269 Our stochastic model depends not only on net proliferation rates ( $s, r$ , see Equation (1)) but  
 270 also on the combination of birth rates ( $b_S, b_R$ ) and death rates ( $d_S, d_R$ ) where  $s = b_S - d_S$  and  
 271  $r = b_R + d_R$ . These five parameters ( $b_s, b_r, d_s, d_r, g$ ) govern the probabilities of events occurring  
 272 (Figure 11 (a)). The time at which one of these events occurs is determined by an exponential  
 273 probability distribution, and we represent the algorithm as pseudo-code thus:

274

(Step 1) Initialize  $\{S(0), R(0)\} = \{C_S^0, C_R^0\}$ .

276

(Step 2) Update from  $t$  to  $t + dt$ :

278

(random number generation)

279

$rt \sim U[0, 1], re \sim U[0, 1]$

280

$a = (b_S + d_S + g)S(t) + (b_R + d_R)R(t)$

281

$dt = -\log(rt)/a$

282

$\{p1, p2, p3, p4, p5\} = \{b_S S(t), d_S S(t), b_R R(t), d_R R(t), g S(t)\}/a$

283

284

if  $re < p1$ , then  $S(t + dt) = S(t) + 1$

285

else if  $re < p2 + p1$ , then  $S(t + dt) = S(t) - 1$

286

else if  $re < p3 + p2 + p1$ , then  $R(t + dt) = R(t) + 1$

287

else if  $re < p4 + p3 + p2 + p1$ , then  $R(t + dt) = R(t) - 1$

288

else,  $S(t + dt) = S(t) - 1$  and  $R(t + dt) = R(t) + 1$

289

(Step 3)  $t \leftarrow t + dt$  and repeat (Step 2) until a set time has passed or extinction has occurred.

290

291 We expanded the stochastic process for a single drug into the process of two drugs being  
 292 switched in turn, like what we did with our ODE system. Figure 11 (b) shows the consistency  
 293 between the mean population based on the stochastic model and the ODE system.  
 294

295

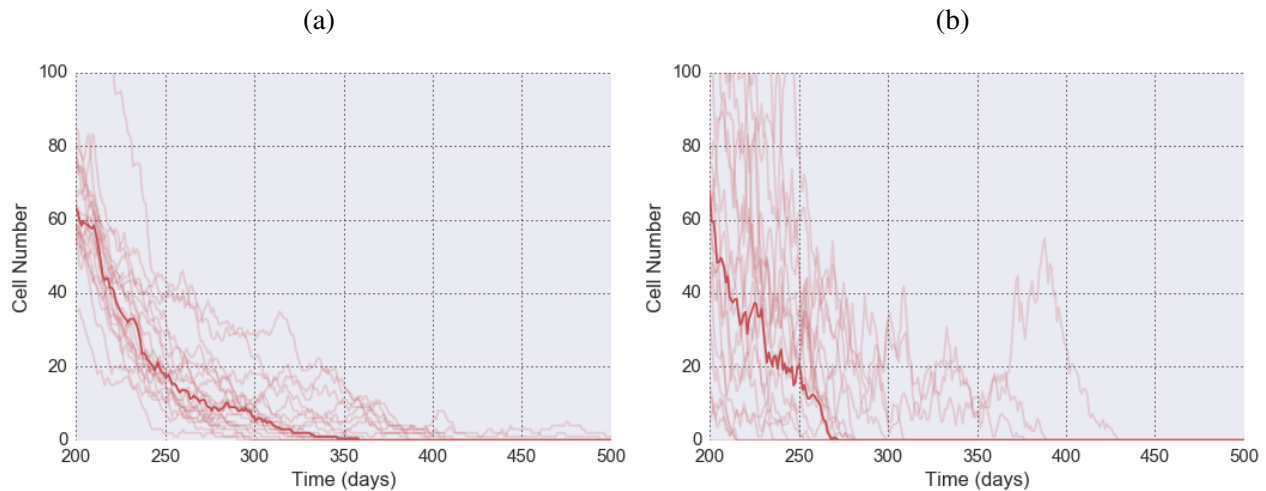

Figure 12: 20 stochastic simulation runs using the same parameters:  $\{s_A, r_A, g_A | s_B, r_B, g_B | A_R^0, B_R^0\} = \{-0.05, 0.005, 0.0001 | -0.05, 0.005, 0.0001 | 1000, 9000\}$  with: Birth - Death = 0.1 (a) and Birth - Death = 1.0 (b). Dark lines show the median cell number.

296 Increased birth/death rates result in larger fluctuations (Figure 12), these fluctuations then in-  
 297 crease the probability of reaching an absorbing state, in this case extinction. The relationship  
 298 between birth/death rates and extinction time is shown in Figure 13. The relationship is significant  
 299 ( $p < 0.05$ ) and strong (slope =  $-93.68 \text{ days}^2$ ).  
 300

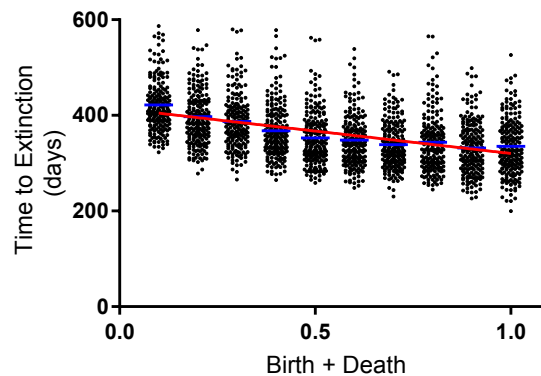

Figure 13: Relationship between birth-death combinations (0.1 to 1.0 with intervals of 0.1) and simulated extinction time in 200 replicates. Parameters are  $\{s_A, r_A, g_A | s_B, r_B, g_B | A_R^0, B_R^0\} = \{-0.05, 0.005, 0.0001 | -0.05, 0.005, 0.0001 | 1000, 9000\}$ . Regression (red line) is  $y = -93.68x + 414$  (slope has  $p < 0.05$ ). Blue lines show mean values.

## 301 5 Conclusions and discussion

302 In this paper, we have proposed a simple, but informative dynamical systems model of tumor evo-  
 303 lution in a heterogeneous tumor composed of two cell phenotypes. While cell phenotype can take  
 304 a large range of definitions, here we completely describe it by considering only sensitivity (or re-  
 305 sistance) to a pair of collaterally sensitive drugs, which is encoded in their differential growth rates.

306 While the resulting mathematical model conveys only simple, but essential, features of cell popu-  
307 lation dynamics, it does yield analytical solutions that more complex models can not. Our original  
308 motivation was to consider more complicated sequences, or cycles of drug therapy, however, the  
309 model presented herein is difficult to apply for an expanded system of more than two drugs. For  
310 an example of a collateral sensitivity cycle of three drugs, *DrugA*, *DrugB* and *DrugC*, we can  
311 consider with three population groups of  $A_R$ ,  $B_R$  and  $C_R$  which are resistant to the indicated drugs  
312 and sensitive to *DrugC*, *DrugA* and *DrugB* respectively following the cycle. However, we need  
313 further assumptions on how to decide sensitivity and resistance against the third drug for each  
314 populations makes the model unwieldy. On the other hand, the cell classification used by other  
315 [11, 12, 21, 24] considers sensitivity and resistance independently, or even specifically to a given,  
316 abstracted, genotype [25, 26]. Therefore, in case of 2 drugs, there are  $2^2 = 4$  groups, (i) sensitive to  
317 both drugs, (ii) (iii) resistant to only one drug, and (iv) resistant to both drugs. This formulation is  
318 easily expanded and applied to more than two drugs [11, 24], and we will consider it in future work.

319  
320 Another limitation of our model is the assumption of constant growth rate which follows an  
321 exponential growth/decay model, which is likely oversimplified. However, this is likely not overly  
322 inappropriate, as we are most interested in the development of resistance – and resistance is typi-  
323 cally thought to begin when tumor burden is much smaller than carrying capacity. However, non-  
324 exponential patterns of cell growth could be reasonably considered, as is done by others (e.g. lo-  
325 gistic growth [23, 27, 28]), due to the limited space and resource of human body for tumor growth,  
326 as well as increasing levels of resistance (increasing growth rates) in the face of continued selective  
327 pressure [29].

328  
329 The usefulness of our analytic results are challenged by the availability of drug parameters,  
330 since the derived expressions in optimal scheduling and dynamical pattern of population make-  
331 up are dependent on the parameters. Drug parameters for several drugs are known based on in  
332 vitro experiment or clinical studies [30, 31]. However, it is not available for all drugs, and even  
333 the results measured in vitro would likely change from one patient to the next. Because of this,  
334 we propose focusing our future work on learning to parameterize models of this type from indi-  
335 vidual patient response data. Examples of parameterizing patient response from imaging [32] as  
336 well as blood based markers [33] already exist, suggesting this is a reasonable goal in the near term.

337  
338 Other possible ideas of future work involve comparison between different models. A recent  
339 area of debate concerns whether cycling, or directly mixing therapies is superior. In our simplified  
340 model, we show under certain regimes of (timing of) drug switching, the effect of drug cycling and  
341 drug mixing strategies are equivalent (Theorem A.8). Further exploring the ramifications of this  
342 through modeling of timing and combinations would be of value [34, 35].

## 343 References

- 344 [1] C. Holohan, S. Van Schaeybroeck, D. B. Longley, and P. G. Johnston, “Cancer drug resistance:  
345 an evolving paradigm,” *Nature reviews. Cancer*, vol. 13, no. 10, p. 714, 2013.
- 346 [2] R. J. Gillies, D. Verduzco, and R. A. Gatenby, “Evolutionary dynamics unifies carcinogenesis  
347 and cancer therapy,” *Nature reviews. Cancer*, vol. 12, no. 7, p. 487, 2012.
- 348 [3] N. Amirouchene-Angelozzi, C. Swanton, and A. Bardelli, “Tumor evolution as a therapeutic  
349 target,” *Cancer Discovery*, vol. 7, no. 8, pp. 805–817, 2017.



- 350 [4] M.-T. Dimanche-Boitrel, C. Garrido, and B. Chauffert, “Kinetic resistance to anticancer  
351 agents,” *Cytotechnology*, vol. 12, no. 1-3, pp. 347–356, 1993.
- 352 [5] A. Thomas, S. El Rouby, J. C. Reed, S. Krajewski, R. Silber, M. Potmesil, and E. W. New-  
353 comb, “Drug-induced apoptosis in b-cell chronic lymphocytic leukemia: relationship between  
354 p53 gene mutation and bcl-2/bax proteins in drug resistance.” *Oncogene*, vol. 12, no. 5,  
355 pp. 1055–1062, 1996.
- 356 [6] C. Scheel and R. A. Weinberg, “Phenotypic plasticity and epithelial-mesenchymal transitions  
357 in cancer and normal stem cells?,” *International journal of cancer*, vol. 129, no. 10, pp. 2310–  
358 2314, 2011.
- 359 [7] D. J. Hutchison, “Cross resistance and collateral sensitivity studies in cancer chemotherapy,”  
360 *Advances in cancer research*, vol. 7, pp. 235–350, 1963.
- 361 [8] A. Dhawan, D. Nichol, F. Kinose, M. E. Abazeed, A. Marusyk, E. B. Haura, and J. G. Scott,  
362 “Collateral sensitivity networks reveal evolutionary instability and novel treatment strategies  
363 in alk mutated non-small cell lung cancer,” *Scientific Reports*, vol. 7, 2017.
- 364 [9] L. Imamovic and M. O. Sommer, “Use of collateral sensitivity networks to design drug cycling  
365 protocols that avoid resistance development,” *Science translational medicine*, vol. 5, no. 204,  
366 pp. 204ra132–204ra132, 2013.
- 367 [10] D. Nichol, J. Rutter, C. Bryant, P. Jeavons, A. Anderson, R. Bonomo, and J. Scott, “Collateral  
368 sensitivity is contingent on the repeatability of evolution,” *bioRxiv*, p. 185892, 2017.
- 369 [11] C. Tomasetti and D. Levy, “An elementary approach to modeling drug resistance in cancer,”  
370 *Mathematical biosciences and engineering: MBE*, vol. 7, no. 4, p. 905, 2010.
- 371 [12] J. Goldie and A. Coldman, “Quantitative model for multiple levels of drug resistance in clini-  
372 cal tumors.” *Cancer treatment reports*, vol. 67, no. 10, pp. 923–931, 1983.
- 373 [13] N. L. Komarova and D. Wodarz, “Evolutionary dynamics of mutator phenotypes in cancer,”  
374 *Cancer Research*, vol. 63, no. 20, pp. 6635–6642, 2003.
- 375 [14] J. Goldie, “Rationale for the use of alternating non-cross-resistant chemotherapy,” *Cancer  
376 Treat Rep*, vol. 66, pp. 439–449, 1982.
- 377 [15] E. Gaffney, “The application of mathematical modelling to aspects of adjuvant chemotherapy  
378 scheduling,” *Journal of mathematical biology*, vol. 48, no. 4, pp. 375–422, 2004.
- 379 [16] E. Gaffney, “The mathematical modelling of adjuvant chemotherapy scheduling: incorpo-  
380 rating the effects of protocol rest phases and pharmacokinetics,” *Bulletin of mathematical  
381 biology*, vol. 67, no. 3, pp. 563–611, 2005.
- 382 [17] E. A. Boston and E. A. Gaffney, “The influence of toxicity constraints in models of chemother-  
383 apeutic protocol escalation,” *Mathematical medicine and biology: a journal of the IMA*,  
384 vol. 28, no. 4, pp. 357–384, 2011.
- 385 [18] J. G. Scott, A. G. Fletcher, A. R. Anderson, and P. K. Maini, “Spatial metrics of tumour vas-  
386 cular organisation predict radiation efficacy in a computational model,” *PLoS computational  
387 biology*, vol. 12, no. 1, p. e1004712, 2016.

- 388 [19] K. A. Rejniak, “A single-cell approach in modeling the dynamics of tumor microregions,”  
389 *Math. Biosci. Eng.*, vol. 2, no. 3, pp. 643–655, 2005.
- 390 [20] J.-H. Chen, Y.-H. Kuo, and H. P. Luh, “Optimal policies of non-cross-resistant chemotherapy  
391 on goldie and coldmans cancer model,” *Mathematical biosciences*, vol. 245, no. 2, pp. 282–  
392 298, 2013.
- 393 [21] J. Goldie and A. Coldman, “A mathematic model for relating the drug sensitivity of tumors  
394 to their spontaneous mutation rate.,” *Cancer treatment reports*, vol. 63, no. 11-12, pp. 1727–  
395 1733, 1979.
- 396 [22] A. Coldman and J. Goldie, “A model for the resistance of tumor cells to cancer chemothera-  
397 peutic agents,” *Mathematical Biosciences*, vol. 65, no. 2, pp. 291–307, 1983.
- 398 [23] P. Gerlee, “The model muddle: in search of tumor growth laws,” *Cancer research*, vol. 73,  
399 no. 8, pp. 2407–2411, 2013.
- 400 [24] J. H. Goldie and A. J. Coldman, *Drug resistance in cancer: mechanisms and models*. Cam-  
401 bridge University Press, 2009.
- 402 [25] N. L. Komarova and D. Wodarz, “Drug resistance in cancer: principles of emergence and pre-  
403 vention,” *Proceedings of the National Academy of Sciences of the United States of America*,  
404 vol. 102, no. 27, pp. 9714–9719, 2005.
- 405 [26] D. Nichol, P. Jeavons, A. G. Fletcher, R. A. Bonomo, P. K. Maini, J. L. Paul, R. A. Gatenby,  
406 A. R. Anderson, and J. G. Scott, “Steering evolution with sequential therapy to prevent the  
407 emergence of bacterial antibiotic resistance,” *PLoS computational biology*, vol. 11, no. 9,  
408 p. e1004493, 2015.
- 409 [27] S. J. Berry, D. S. Coffey, P. C. Walsh, and L. L. Ewing, “The development of human benign  
410 prostatic hyperplasia with age,” *The Journal of urology*, vol. 132, no. 3, pp. 474–479, 1984.
- 411 [28] N. C. Atuegwu, L. R. Arlinghaus, X. Li, A. B. Chakravarthy, V. G. Abramson, M. E. Sanders,  
412 and T. E. Yankeelov, “Parameterizing the logistic model of tumor growth by dw-mri and  
413 dce-mri data to predict treatment response and changes in breast cancer cellularity during  
414 neoadjuvant chemotherapy,” *Translational oncology*, vol. 6, no. 3, pp. 256–264, 2013.
- 415 [29] J. Scott and A. Marusyk, “Somatic clonal evolution: A selection-centric perspective,”  
416 *Biochimica et Biophysica Acta (BBA)-Reviews on Cancer*, vol. 1867, no. 2, pp. 139–150,  
417 2017.
- 418 [30] T. L. Jackson and H. M. Byrne, “A mathematical model to study the effects of drug resistance  
419 and vasculature on the response of solid tumors to chemotherapy,” *Mathematical biosciences*,  
420 vol. 164, no. 1, pp. 17–38, 2000.
- 421 [31] W. H. Wilson, J. Teruya-Feldstein, T. Fest, C. Harris, S. M. Steinberg, E. S. Jaffe, and M. Raf-  
422 feld, “Relationship of p53, bcl-2, and tumor proliferation to clinical drug resistance in non-  
423 hodgkin9s lymphomas,” *Blood*, vol. 89, no. 2, pp. 601–609, 1997.
- 424 [32] K. R. Swanson, R. C. Rockne, J. Claridge, M. A. Chaplain, E. C. Alvord, and A. R. Anderson,  
425 “Quantifying the role of angiogenesis in malignant progression of gliomas: in silico modeling  
426 integrates imaging and histology,” *Cancer research*, vol. 71, no. 24, pp. 7366–7375, 2011.

- 427 [33] B. Werner, J. G. Scott, A. Sottoriva, A. R. Anderson, A. Traulsen, and P. M. Altrock, “The  
 428 cancer stem cell fraction in hierarchically organized tumors can be estimated using mathe-  
 429 matical modeling and patient-specific treatment trajectories,” *Cancer research*, vol. 76, no. 7,  
 430 pp. 1705–1713, 2016.
- 431 [34] R. E. Beardmore, R. Peña-Miller, F. Gori, and J. Iredell, “Antibiotic cycling and antibiotic  
 432 mixing: which one best mitigates antibiotic resistance?,” *Molecular biology and evolution*,  
 433 vol. 34, no. 4, pp. 802–817, 2017.
- 434 [35] R. Pena-Miller and R. Beardmore, “Antibiotic cycling versus mixing: the difficulty of using  
 435 mathematical models to definitively quantify their relative merits.” 2010.

## 436 Appendix A Derivations of explicit expressions

437 **Definition**  $\mathbb{D}_A := \begin{pmatrix} r_A & g_A \\ 0 & s_A - g_A \end{pmatrix}$ ,  $\mathbb{D}_B := \begin{pmatrix} s_B - g_B & 0 \\ g_B & r_B \end{pmatrix}$ ,  $V(t) := \begin{pmatrix} A_R(t) \\ B_R(t) \end{pmatrix}$ ,

438

439  $\mathbb{M}_A(t) := \begin{pmatrix} e^{r_A t} & \frac{g_A (e^{r_A t} - e^{-(g_A - s_A) t})}{g_A + r_A - s_A} \\ 0 & e^{-(g_A - s_A) t} \end{pmatrix}$ ,  $\mathbb{M}_B(t) := \begin{pmatrix} e^{-(g_B - s_B) t} & 0 \\ \frac{g_B (e^{r_B t} - e^{-(g_B - s_B) t})}{g_B + r_B - s_B} & e^{r_B t} \end{pmatrix}$ ,

440

441  $\mathbb{A}_\epsilon := \mathbb{M}_A(f \epsilon)$ ,  $\mathbb{B}_\epsilon := \mathbb{M}_B((1 - f)\epsilon)$ ,

442

443  $\min [V(t_1), V(t_2), \dots, V(t_n)] := \begin{pmatrix} \min [A_R(t_1), A_R(t_2), \dots, A_R(t_n)] \\ \min [B_R(t_1), B_R(t_2), \dots, B_R(t_n)] \end{pmatrix}$ ,

444

445  $\max [V(t_1), V(t_2), \dots, V(t_n)] := \begin{pmatrix} \max [A_R(t_1), A_R(t_2), \dots, A_R(t_n)] \\ \max [B_R(t_1), B_R(t_2), \dots, B_R(t_n)] \end{pmatrix}$ .

446 **Proposition A.1.** *Under the therapy with Drug A,*

447 
$$V'(t) = \mathbb{D}_A V(t), \quad V(t_0 + \Delta t) = \mathbb{M}_A(\Delta t) V(t_0).$$

448 *Under the therapy with Drug B,*

449 
$$V'(t) = \mathbb{D}_B V(t), \quad V(t_0 + \Delta t) = \mathbb{M}_B(\Delta t) V(t_0).$$

### 450 A.1 Differential system of instantaneous drug switch

451 **Proposition A.2.** *Both  $A_R$  and  $B_R$  are monotonic functions under either therapy. Under the pres-  
 452 ence of Drug A,  $A_R$  is increasing, and  $B_R$  is decreasing. And, under the presence of Drug B,  $A_R$  is  
 453 decreasing, and  $B_R$  is increasing.*

454 **Proposition A.3.**  $\mathbb{A}_\epsilon|_{\epsilon=0} = \mathbb{B}_\epsilon|_{\epsilon=0} = I_2$  for all  $0 \leq f \leq 1$

455 **Proposition A.4.**  $\frac{d}{d\epsilon} \mathbb{A}_\epsilon \Big|_{\epsilon=0} = f \mathbb{D}_A$ ,  $\frac{d}{d\epsilon} \mathbb{B}_\epsilon \Big|_{\epsilon=0} = (1 - f) \mathbb{D}_B$  for all  $0 \leq f \leq 1$

456 **Lemma A.5.**  $\lim_{\epsilon \rightarrow 0} \frac{\mathbb{B}_\epsilon \mathbb{A}_\epsilon - I_2}{\epsilon} = f \mathbb{D}_A + (1 - f) \mathbb{D}_B$  for all  $0 \leq f \leq 1$

*Proof.*

$$\begin{aligned} \lim_{\epsilon \rightarrow 0} \frac{\mathbb{B}_\epsilon \mathbb{A}_\epsilon - I_2}{\epsilon} &= \lim_{\epsilon \rightarrow 0} \frac{\frac{d}{d\epsilon}(\mathbb{B}_\epsilon \mathbb{A}_\epsilon - I_2)}{\frac{d}{d\epsilon} \epsilon} && \text{(by L'Hospital's Rule)} \\ &= \lim_{\epsilon \rightarrow 0} \frac{\frac{d\mathbb{B}_\epsilon}{d\epsilon} \mathbb{A}_\epsilon + \mathbb{B}_\epsilon \frac{d\mathbb{A}_\epsilon}{d\epsilon}}{1} \\ &= f \mathbb{D}_A + (1 - f) \mathbb{D}_B && \text{(by Propositions A.3 - A.4)} \end{aligned}$$

457

□

458 **Lemma A.6.**  $\lim_{\epsilon \rightarrow 0} \frac{(\mathbb{B}_\epsilon \mathbb{A}_\epsilon)^n - I_2}{n \epsilon} = f \mathbb{D}_A + (1 - f) \mathbb{D}_B$  for any positive integer,  $n$ , and for all  
459  $0 \leq f \leq 1$

*Proof.* Let  $F(n) := \lim_{\epsilon \rightarrow 0} \frac{(\mathbb{B}_\epsilon \mathbb{A}_\epsilon)^n - I_2}{n \epsilon}$  and  $L := f \mathbb{D}_A + (1 - f) \mathbb{D}_B$ .

Then, we need to prove that  $F(n) = L$  for  $n = 1, 2, 3, \dots$

If  $n = 1$ ,

$$F(n) = F(1) = L \quad \text{(by Lemma A.5)}$$

Otherwise, if  $n \geq 2$  and  $F(m) = L$  for all  $1 \leq m \leq n - 1$ ,

$$\begin{aligned} F(n) &= \lim_{\epsilon \rightarrow 0} \frac{(\mathbb{B}_\epsilon \mathbb{A}_\epsilon)^n - I_2}{n \epsilon} \\ &= \lim_{\epsilon \rightarrow 0} \frac{((\mathbb{B}_\epsilon \mathbb{A}_\epsilon)^{n-1} - I_2)(\mathbb{B}_\epsilon \mathbb{A}_\epsilon) + (\mathbb{B}_\epsilon \mathbb{A}_\epsilon - I_2)}{n \epsilon} \\ &= \frac{n-1}{n} \lim_{\epsilon \rightarrow 0} \frac{((\mathbb{B}_\epsilon \mathbb{A}_\epsilon)^{n-1} - I_2)(\mathbb{B}_\epsilon \mathbb{A}_\epsilon)}{(n-1) \epsilon} + \frac{1}{n} \lim_{\epsilon \rightarrow 0} \frac{\mathbb{B}_\epsilon \mathbb{A}_\epsilon - I_2}{\epsilon} \\ &= \frac{n-1}{n} F(n-1) + \frac{1}{n} F(1) \\ &= \frac{n-1}{n} L + \frac{1}{n} L && \text{(by the inductive assumption)} \\ &= L \end{aligned}$$

460

Therefore, proved.

□

461 **Lemma A.7.**  $\lim_{\epsilon \rightarrow 0} \frac{\mathbb{A}_\epsilon (\mathbb{B}_\epsilon \mathbb{A}_\epsilon)^n - I_2}{(n+f) \epsilon} = \frac{(n+1)f}{n+f} \mathbb{D}_A + \frac{n(1-f)}{n+f} \mathbb{D}_B$  for any positive integer,  $n$ , and  
462 for all  $0 \leq f \leq 1$

*Proof.* Using mathematical induction, if  $n=1$ ,

$$\begin{aligned}
& \lim_{\epsilon \rightarrow 0} \frac{\mathbb{A}_\epsilon(\mathbb{B}_\epsilon \mathbb{A}_\epsilon) - I_2}{(1+f)\epsilon} \\
&= \frac{1}{1+f} \lim_{\epsilon \rightarrow 0} \frac{\mathbb{A}_\epsilon(\mathbb{B}_\epsilon \mathbb{A}_\epsilon - I_2) + (\mathbb{A}_\epsilon - I_2)}{\epsilon} \\
&= \frac{1}{1+f} \left[ \lim_{\epsilon \rightarrow 0} \mathbb{A}_\epsilon \lim_{\epsilon \rightarrow 0} \frac{\mathbb{B}_\epsilon \mathbb{A}_\epsilon - I_2}{\epsilon} + \lim_{\epsilon \rightarrow 0} \frac{\mathbb{A}_\epsilon - I_2}{\epsilon} \right] \\
&= \frac{1}{1+f} \left[ I_2(f \mathbb{D}_A + (1-f)\mathbb{D}_B) + \frac{d}{d\epsilon} \mathbb{A}_\epsilon \Big|_{\epsilon=0} \right] \quad (\text{by Proposition A.3 and Lemma A.5}) \\
&= \frac{1}{1+f} [(f \mathbb{D}_A + (1-f)\mathbb{D}_B) + k \mathbb{D}_A] \quad (\text{by Proposition A.4}) \\
&= \frac{2f}{1+f} \mathbb{D}_A + \frac{1-f}{1+f} \mathbb{D}_B \quad \text{The equality is true for } n = 1
\end{aligned}$$

If  $n \geq 2$ , and the equality works for all integers  $1 \leq m \leq n-1$ ,

$$\begin{aligned}
& \lim_{\epsilon \rightarrow 0} \frac{\mathbb{A}_\epsilon(\mathbb{B}_\epsilon \mathbb{A}_\epsilon)^n - I_2}{(n+f)\epsilon} \\
&= \frac{1}{n+f} \left[ \lim_{\epsilon \rightarrow 0} \frac{(\mathbb{A}_\epsilon(\mathbb{B}_\epsilon \mathbb{A}_\epsilon)^{n-1} - I_2)(\mathbb{B}_\epsilon \mathbb{A}_\epsilon) + (\mathbb{B}_\epsilon \mathbb{A}_\epsilon - I_2)}{\epsilon} \right] \\
&= \frac{1}{n+f} \left[ ((n-1)+f) \lim_{\epsilon \rightarrow 0} \frac{(\mathbb{A}_\epsilon(\mathbb{B}_\epsilon \mathbb{A}_\epsilon)^{n-1} - I_2)}{((n-1)+f)\epsilon} \lim_{\epsilon \rightarrow 0} (\mathbb{B}_\epsilon \mathbb{A}_\epsilon) + \lim_{\epsilon \rightarrow 0} \frac{\mathbb{B}_\epsilon \mathbb{A}_\epsilon - I_2}{\epsilon} \right] \\
&= \frac{1}{n+f} \left[ ((n-1)+f) \left( \frac{nf}{(n-1)+f} \mathbb{D}_A + \frac{(n-1)(1-f)}{(n-1)+f} \mathbb{D}_B \right) (I_2 I_2) \right. \\
&\quad \left. + (f \mathbb{D}_A + (1-f)\mathbb{D}_B) \right] \\
&\quad (\text{by the inductive assumption and Proposition A.3 and Lemma A.5}) \\
&= \frac{(n+1)f}{n+f} \mathbb{D}_A + \frac{n(1-f)}{n+f} \mathbb{D}_B \quad (\text{The equality is true for } n \geq 2)
\end{aligned}$$

463 Therefore, proved. □

464 **Theorem A.8.** *If Drug A and Drug B are prescribed in turn with relative intensity  $f$  and  $1-f$ ,*  
465 *and are switched instantaneously,  $V$  obeys*

$$466 \quad \frac{dV}{dt} = (f \mathbb{D}_A + (1-f)\mathbb{D}_B)V$$

*Proof.* For any time point  $t_0$ , let us define  $V_\epsilon(t)$  as a vector-valued function of  $A_R(t)$  and  $B_R(t)$  describing cell population dynamics under periodic therapy started on  $t_0$  with Drug A assigned on  $t_0 + m\epsilon \leq t < t_0 + (m+f)\epsilon$  and Drug B on  $t_0 + (m+f)\epsilon \leq t < t_0 + (m+1)\epsilon$  for  $m = 0, 1, 2, 3, \dots$ . Then, by Proposition A.1 and the definitions of  $\mathbb{A}$  and  $\mathbb{B}$ ,

$$V_\epsilon(t_0 + m\epsilon) = (\mathbb{B}_\epsilon \mathbb{A}_\epsilon)^m V(t_0), \quad V_\epsilon(t_0 + (m+f)\epsilon) = \mathbb{A}_\epsilon(\mathbb{B}_\epsilon \mathbb{A}_\epsilon)^m V(t_0) \quad \dots (*1)$$

where  $V(t_0) = \begin{pmatrix} A_R(t_0) \\ B_R(t_0) \end{pmatrix}$ . And,  $V_0(t)$  represents instantaneous drug switch.

For any  $\Delta t > 0$  and any positive integer  $n$ , there exists  $\epsilon = \epsilon(n, \Delta t)$  such that

$$\frac{\Delta t}{n+1} < \epsilon \leq \frac{\Delta t}{n} \quad \text{or} \quad 1 \leq \frac{\Delta t}{n\epsilon} < 1 + \frac{1}{n}.$$

Then by the squeeze theorem,

$$\lim_{\Delta t \rightarrow 0} \epsilon(n, \Delta t) = 0 \text{ for any positive integer } n, \text{ and } \lim_{n \rightarrow \infty} \frac{\Delta t}{n \epsilon(n, \Delta t)} = 1 \text{ for any } \Delta t > 0. \quad \dots (*2)$$

For such  $\Delta t$ ,  $n$  and  $\epsilon(n, \Delta t)$ ,  $V_\epsilon(t_0 + \Delta t)$  is bounded, since local extrema can occur only at which drugs switch by Proposition A.2. That is,

$$\begin{aligned} \min [V_\epsilon(t_0 + n \epsilon), V_\epsilon(t_0 + (n + f)\epsilon), V_\epsilon(t_0 + (n + 1)\epsilon)] &\leq V_\epsilon(t_0 + \Delta t) \\ &\leq \max [V_\epsilon(t_0 + n \epsilon), V_\epsilon(t_0 + (n + f)\epsilon), V_\epsilon(t_0 + (n + 1)\epsilon)], \end{aligned} \quad \dots (*3)$$

Also,

$$\begin{aligned} &\lim_{\Delta t \rightarrow 0} \frac{\lim_{n \rightarrow \infty} V_{\epsilon(n, \Delta t)}(t_0 + n \epsilon(n, \Delta t)) - V(t_0)}{\Delta t} \\ &= \lim_{\Delta t \rightarrow 0} \lim_{n \rightarrow \infty} \frac{(\mathbb{B}_\epsilon \mathbb{A}_\epsilon)^n - I_2}{\Delta t} V(t_0) \quad \text{(by (*1))} \\ &= \frac{\lim_{\Delta t \rightarrow 0} \lim_{n \rightarrow \infty} [(\mathbb{B}_\epsilon \mathbb{A}_\epsilon)^n - I_2] / (n \epsilon)}{\lim_{\Delta t \rightarrow 0} \lim_{n \rightarrow \infty} \Delta t / (n \epsilon)} V(t_0) \\ &= \frac{\lim_{n \rightarrow \infty} [\lim_{\Delta t \rightarrow 0} [(\mathbb{B}_\epsilon \mathbb{A}_\epsilon)^n - I_2] / (n \epsilon)]}{\lim_{\Delta t \rightarrow 0} [\lim_{n \rightarrow \infty} \Delta t / (n \epsilon)]} V(t_0) \\ &= \frac{\lim_{n \rightarrow \infty} [\lim_{\epsilon \rightarrow 0} [(\mathbb{B}_\epsilon \mathbb{A}_\epsilon)^n - I_2] / (n \epsilon)]}{\lim_{\Delta t \rightarrow 0} 1} V(t_0) \quad \text{by (*2)} \\ &= \lim_{n \rightarrow \infty} [f \mathbb{D}_A + (1 - f) \mathbb{D}_B] V(t_0) \quad \text{(by Lemma A.6)} \\ &= (f \mathbb{D}_A + (1 - f) \mathbb{D}_B) V(t_0). \quad \dots (*4) \end{aligned}$$

And,

$$\begin{aligned} &\lim_{\Delta t \rightarrow 0} \frac{\lim_{n \rightarrow \infty} V_{\epsilon(n, \Delta t)}(t_0 + (n + f) \epsilon(n, \Delta t)) - V(t_0)}{\Delta t} \\ &= \lim_{\Delta t \rightarrow 0} \lim_{n \rightarrow \infty} \frac{\mathbb{A}_\epsilon (\mathbb{B}_\epsilon \mathbb{A}_\epsilon)^n - I_2}{\Delta t} V(t_0) \quad \text{(by (*1))} \\ &= \frac{\lim_{\Delta t \rightarrow 0} \lim_{n \rightarrow \infty} [\mathbb{A}_\epsilon (\mathbb{B}_\epsilon \mathbb{A}_\epsilon)^n - I_2] / ((n + f) \epsilon)}{\lim_{\Delta t \rightarrow 0} \lim_{n \rightarrow \infty} \Delta t / ((n + f) \epsilon)} V(t_0) \\ &= \frac{\lim_{n \rightarrow \infty} [\lim_{\Delta t \rightarrow 0} [(\mathbb{B}_\epsilon \mathbb{A}_\epsilon)^n - I_2] / ((n + f) \epsilon)]}{\lim_{\Delta t \rightarrow 0} [\lim_{n \rightarrow \infty} (\Delta t / (n \epsilon)) (n / (n + f))]} V(t_0) \\ &= \frac{\lim_{n \rightarrow \infty} [\lim_{\epsilon \rightarrow 0} [(\mathbb{B}_\epsilon \mathbb{A}_\epsilon)^n - I_2] / ((n + f) \epsilon)]}{\lim_{\Delta t \rightarrow 0} 1} V(t_0) \quad \text{by (*2)} \\ &= \lim_{n \rightarrow \infty} \left[ \frac{(n + 1)f}{n + f} \mathbb{D}_A + \frac{n(1 - f)}{n + f} \mathbb{D}_B \right] V(t_0) \quad \text{(by Lemma A.7)} \\ &= (f \mathbb{D}_A + (1 - f) \mathbb{D}_B) V(t_0) \quad \dots (*5) \end{aligned}$$

Similar to (\*4),

$$\lim_{\Delta t \rightarrow 0} \frac{\lim_{n \rightarrow \infty} V_{\epsilon(n, \Delta t)}(t_0 + (n + 1) \epsilon(n, \Delta t)) - V(t_0)}{\Delta t} = (f \mathbb{D}_A + (1 - f) \mathbb{D}_B) V(t_0) \quad \dots (*6)$$



By (\*4) - (\*6),

$$\begin{aligned} & \min \left[ \lim_{\Delta t \rightarrow 0} \frac{\lim_{n \rightarrow \infty} V_\epsilon(t_0 + n \epsilon) - V(t_0)}{\Delta t}, \lim_{\Delta t \rightarrow 0} \frac{\lim_{n \rightarrow \infty} V_\epsilon(t_0 + (n + f) \epsilon) - V(t_0)}{\Delta t}, \right. \\ & \left. \lim_{\Delta t \rightarrow 0} \frac{\lim_{n \rightarrow \infty} V_\epsilon(t_0 + (n + 1) \epsilon) - V(t_0)}{\Delta t} \right] = \max \left[ \lim_{\Delta t \rightarrow 0} \frac{\lim_{n \rightarrow \infty} V_\epsilon(t_0 + n \epsilon) - V(t_0)}{\Delta t}, \right. \\ & \left. \lim_{\Delta t \rightarrow 0} \lim_{\Delta t \rightarrow 0} \frac{\lim_{n \rightarrow \infty} V_\epsilon(t_0 + (n + f) \epsilon) - V(t_0)}{\Delta t}, \lim_{\Delta t \rightarrow 0} \frac{\lim_{n \rightarrow \infty} V_\epsilon(t_0 + (n + 1) \epsilon) - V(t_0)}{\Delta t} \right] \\ & = (f \mathbb{D}_A + (1 - f) \mathbb{D}_B) V(t_0) \quad \dots (*7) \end{aligned}$$

467 Then, by (\*3), (\*7) and the squeeze theorem,

$$468 \quad \left. \frac{d}{dt} V_0 \right|_{t=t_0} = \lim_{\Delta t \rightarrow 0} \frac{\lim_{n \rightarrow \infty} V_\epsilon(t_0 + \Delta t) - V(t_0)}{\Delta t} = (f \mathbb{D}_A + (1 - f) \mathbb{D}_B) V(t_0)$$

469 Therefore,

$$470 \quad \frac{dV}{dt} = (f \mathbb{D}_A + (1 - f) \mathbb{D}_B) V$$

471 □

## 472 A.2 Population dynamics with the optimal regimen

473 **Lemma A.9.**  $\left\{ \frac{r_A r_B - s_A s_B}{r_A + r_B - s_A - s_B}, \begin{pmatrix} ApB^* \\ 1 \end{pmatrix} \right\}$  is an eigen pair of  $f^* \mathbb{D}_A + (1 - f^*) \mathbb{D}_B$  with  
474  $ApB^*$  and  $f^*$  from (8), (10) and (13).

475 *Proof.* Let  $\mathbb{D}^* := f^* \mathbb{D}_A + (1 - f^*) \mathbb{D}_B$ , and  $\lambda = \frac{r_A r_B - s_A s_B}{r_A + r_B - s_A - s_B}$ . Then,

$$476 \quad \mathbb{D}^* - \lambda I_2 = C_1 \begin{pmatrix} C_2 U^T \\ C_3 U^T \end{pmatrix},$$

where  $U = \begin{pmatrix} 1 \\ -ApB^* \end{pmatrix}$  along with

$$C_1 = -(g_A(r_A - s_B) + g_B(r_B - s_A) + (r_B - s_A)(r_A - s_B))(r_A + r_B - s_A - s_B)/(r_A - s_B),$$

$$C_2 = g_A((r_A - s_B)(r_B - s_B) + g_B(r_A + r_B - s_A - s_B)),$$

$$C_3 = -g_B((r_B - s_A)(r_A - s_A) + g_A(r_A + r_B - s_A - s_B)).$$

477 Since  $U^T V = 0$  where  $V = ((r_B - s_A)/(r_A - s_B), 1)^T$ ,  $(\lambda, V)$  is an eigen pair of  $\mathbb{D}^*$ . □

478 **Theorem A.10.** In Stage 2 of the optimal strategy, both  $A_R$  and  $B_R$  changes with a constant net-  
479 proliferation rate,

$$480 \quad \lambda = \frac{r_A r_B - s_A s_B}{r_A + r_B - s_A - s_B}.$$

481 *Proof.* Without loss of generosity, let us prove it only when  $ApB(0) < ApB^*$ .

482

If  $ApB(0) < ApB^*$ , *DrugA* has a better effect initially. So following the optimal therapy scheduling, *DrugA* is assigned alone at the beginning as long as  $T_{min}^A = T_{min}(p_A, p_B, ApB(0))$  (Stage 1), and then Stage 2 starts at  $T_{min}^A$  with initial condition

$$V(T_{min}^A) = \mathbb{M}_A(T_{min}^A)V(0) = C \begin{pmatrix} ApB^* \\ 1 \end{pmatrix} \quad \dots (*1)$$

483 where  $C = \frac{P(0)}{1 + ApB(0)} \left( \frac{(r_A - s_A)(r_B - s_A) + g_A(r_A + r_B - s_A - s_B)}{(r_A - s_B)(g_A + ApB(0)(g_A + r_A - s_A))} \right)^{-\frac{g_A - s_A}{g_A + r_A - s_A}}$ .

484 By Theorem A.8, in Stage 2,  $V(t)$  obeys

485 
$$\frac{dV}{dt} = \mathbb{D}^*V, \text{ where } \mathbb{D}^* = f^*\mathbb{D}_A + (1 - f^*)\mathbb{D}_B \quad \dots (*2)$$

487 By Lemma A.9,  $V(T_{min}^A)$  is an eigenvector of  $\mathbb{D}^*$  with the corresponding eigenvalue,  $\lambda$ . Then,  
488 the solution of (\*2) with the initial value (\*1) is

489 
$$V(t + T_{min}^A) = e^{\lambda t}V(T_{min}^A).$$

490 □

491 **Theorem A.11.** *With optimal therapy utilizing DrugA and DrugB, V obeys the following equa-*  
492 *tions and solutions.*

493 *If  $ApB(0) < ApB^*$ ,*

494 
$$\frac{dV}{dt} = \begin{cases} \mathbb{D}_A V & \text{if } 0 \leq t \leq T_{min}^A \\ \lambda V & \text{if } t > T_{min}^A \end{cases} \quad \text{and } V(t) = \begin{cases} \mathbb{M}_A(t)V(0) & \text{if } 0 \leq t \leq T_{min}^A \\ e^{\lambda(t - T_{min}^A)}V(T_{min}^A) & \text{if } t > T_{min}^A \end{cases}$$

495 *Similarly if  $ApB(0) \geq ApB^*$ ,*

496 
$$\frac{dV}{dt} = \begin{cases} \mathbb{D}_B V & \text{if } 0 \leq t \leq T_{min}^B \\ \lambda V & \text{if } t > T_{min}^B \end{cases} \quad \text{and } V(t) = \begin{cases} \mathbb{M}_B(t)V(0) & \text{if } 0 \leq t \leq T_{min}^B \\ e^{\lambda(t - T_{min}^B)}V(T_{min}^B) & \text{if } t > T_{min}^B \end{cases}$$

497 *Proof.* Straightforward, by Theorem A.10 □

## 499 Appendix B Sensitivity analysis on optimal scheduling

500 The two determinant quantities of optimal control scheduling are (i) the duration of the first stage  
501 ( $T_{min}^1$ ), and (ii) the relative intensity between two drugs in the second stage ( $k^*$  or  $f^*$ ). Here, we  
502 show sensitivity analysis on the quantities related to them over a range of model parameters.

503 Using  $g_1$ , we non-dimensionalize all the values, like

504 
$$\{\bar{s}_1, \bar{r}_1 | \bar{s}_2, \bar{r}_2\} := \frac{1}{g_1} \{s_1, r_1 | s_2, r_2\} \quad \text{and} \quad \bar{T}_{gap} := g_1 T_{gap}$$

505 then,

506 
$$\bar{T}_{gap}(\{\bar{s}_1, \bar{r}_1\}, \{\bar{s}_2, \bar{r}_2\}) := \frac{\ln \left[ \frac{(1 - \bar{s}_1)(\bar{r}_1 - \bar{s}_1)(\bar{r}_1 - \bar{s}_2)}{\bar{r}_1((\bar{r}_1 - \bar{s}_1)(\bar{r}_2 - \bar{s}_1) + (\bar{r}_1 + \bar{r}_2 - \bar{s}_1 - \bar{s}_2))} \right]}{1 + \bar{r}_1 - \bar{s}_1} \quad (11)$$

507 In general, cells mutate in a slower way than they proliferate (**ref**), so we ran sensitivity analysis  
 508 on  $T_{gap}$  for all  $a \gg 1$  for  $a \in \{-\bar{s}_1, -\bar{s}_2, \bar{r}_1, \bar{r}_2\}$ . Figure 14 shows  $T_{gap}$  over the range of  $20 \leq$   
 509  $-\bar{s}_1, -\bar{s}_2, \bar{r}_1, \bar{r}_2 \leq 100$ . So, under the assumption that  $g_1 \ll \min\{-s_1, -s_2, r_1, r_2\}$ ,

$$510 \quad T_{gap}(\{s_1, r_1\}, \{s_2, r_2\}) \approx \frac{\ln \left[ \frac{-s_1(r_1 - s_2)}{r_1(r_2 - s_1)} \right]}{r_1 - s_1},$$

511 which approximate the contour curves of Figure 14.

512

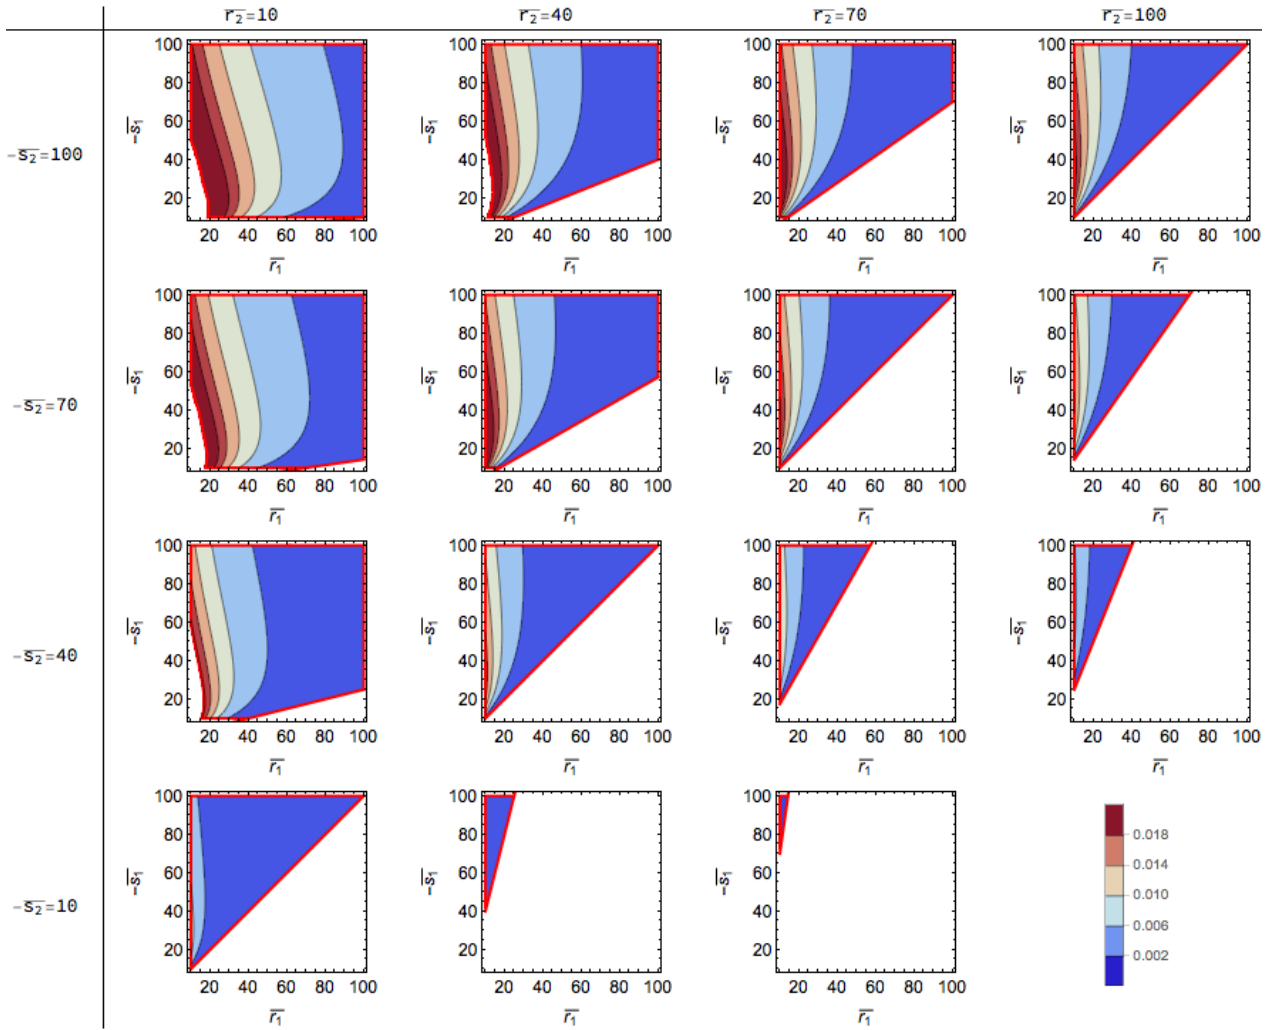

Figure 14: Contour maps of  $T_{gap}$  over ranges of  $20 \leq a \leq 100$  for  $a \in \{-s_1, -s_2, r_1, r_2\}$  and  $r_1 r_2 < s_1 s_2$  (Condition (6))

513 Regarding the regulated intensities among the two drugs,  $k^*$ , we assumed that  $g_1 \approx g_2 := g$ ,  
 514 similarly assuming that they are both much smaller than  $\{-s_1, -s_2, r_1, r_2\}$ . Then we normalized  
 515 all the parameters with the unit of  $g$ , like

$$516 \quad \{\bar{s}_1, \bar{r}_1 | \bar{s}_2, \bar{r}_2\} := \frac{1}{g} \{s_1, r_1 | s_2, r_2\}.$$

517  $k^*$  can be rewritten in terms of the dimensionless parameters.

$$k^*(\{\bar{s}_1, \bar{r}_1\}, \{\bar{s}_2, \bar{r}_2\}) = \frac{(\bar{r}_1 - \bar{s}_2)((\bar{r}_1 - \bar{s}_1)(\bar{r}_2 - \bar{s}_1) + (\bar{r}_1 + \bar{r}_2 - \bar{s}_1 - \bar{s}_2))}{(\bar{r}_2 - \bar{s}_1)((\bar{r}_2 - \bar{s}_2)(\bar{r}_1 - \bar{s}_2) + (\bar{r}_1 + \bar{r}_2 - \bar{s}_1 - \bar{s}_2))} \quad (12)$$

518 In sensitivity analysis, we use

$$f^* := \frac{k^*}{1 + k^*}, \quad (13)$$

519 which represents intensity fraction of initially better drug out of total therapy. We evaluated  $f^*$   
 520 over the same ranges of  $\{s_1, s_2, r_1, r_2\}$  like the previous exercise. (see Figure 15) Over the ranges,  
 521  $\max\{g_1, g_2\} \ll \min\{-s_1, -s_2, r_1, r_2\}$ , so  $k^*$  and  $f^*$  can be approximated by simpler forms.

$$522 \quad k^* \approx \frac{r_1 - s_1}{r_2 - s_2} \quad \text{and} \quad f^* \approx \frac{r_1 - s_1}{r_1 + r_2 - s_1 - s_2}$$

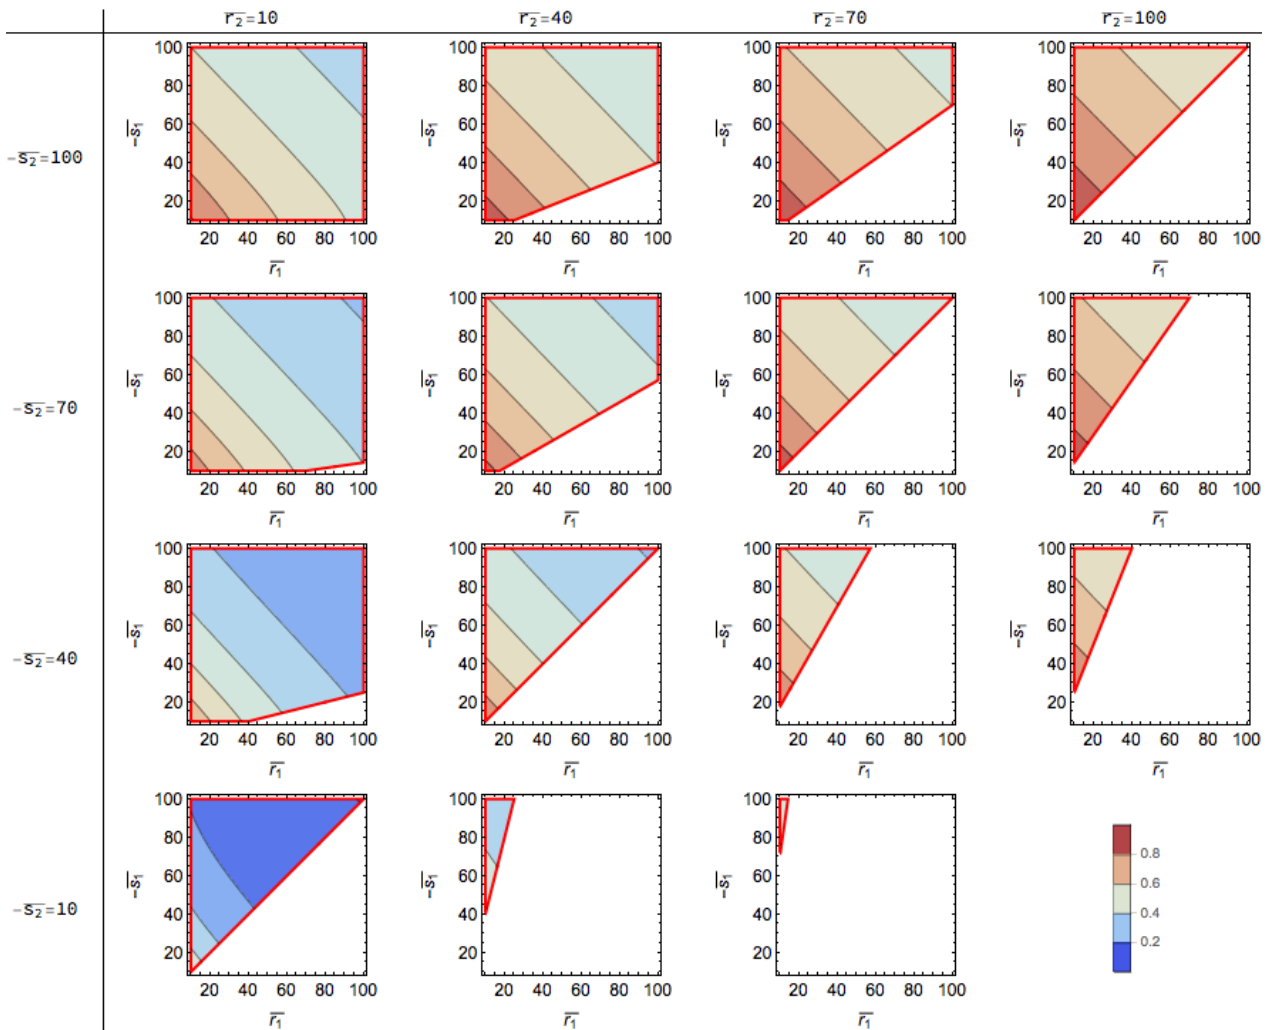

Figure 15: Contour maps of  $f^*$  over ranges of  $20 \leq a \leq 100$  for  $a \in \{-s_1, -s_2, r_1, r_2\}$  and  $r_1 r_2 < s_1 s_2$  (Condition (6))

## 523 Appendix C Clinical implementation of instantaneous switch 524 in the optimal strategy

525 In clinical practice, the instantaneous drug-switch which is proposed in this research to apply in the  
526 second stage of the optimal control is not implementable. Therefore, we studied similar schedules  
527 to the optimal case, and compared the therapy effects between the different schedules of admin-  
528 istrations. In the "similar" schedules, the first stage with an initial drug remained same to the  
529 optimal schedule, but the second part of instantaneous switch (with  $\Delta t = 0$ ) has been modified  
530 into fast switch ( $\Delta t \gtrsim 0$ ). Figure 16 shows how the effect on population with instantaneous switch  
531 ( $\Delta t = 0$ ) and fast switches (multiple choices of  $\Delta t \gtrsim 0$ ) are different for a choice of drug parameter  
532 values. Expectedly, the smaller  $\Delta t$  is chosen, the closer to the ideal case of therapy effect. And,  
533 a choice of reasonably small  $\Delta t$  (like 1 day or 3 days) results in the outcome quite close to the  
534 optimal scenario.

535  
536 We simulated same exercise with  $k^*$  (from (10)) instead of  $k(\Delta t)$  modulated by  $\Delta t$  (Figure  
537 17). Only invisibly small differences has been observed between Figure 16 and Figure 17, which  
538 justifies general usage of  $k^*$  independent from  $\Delta t$ .

539

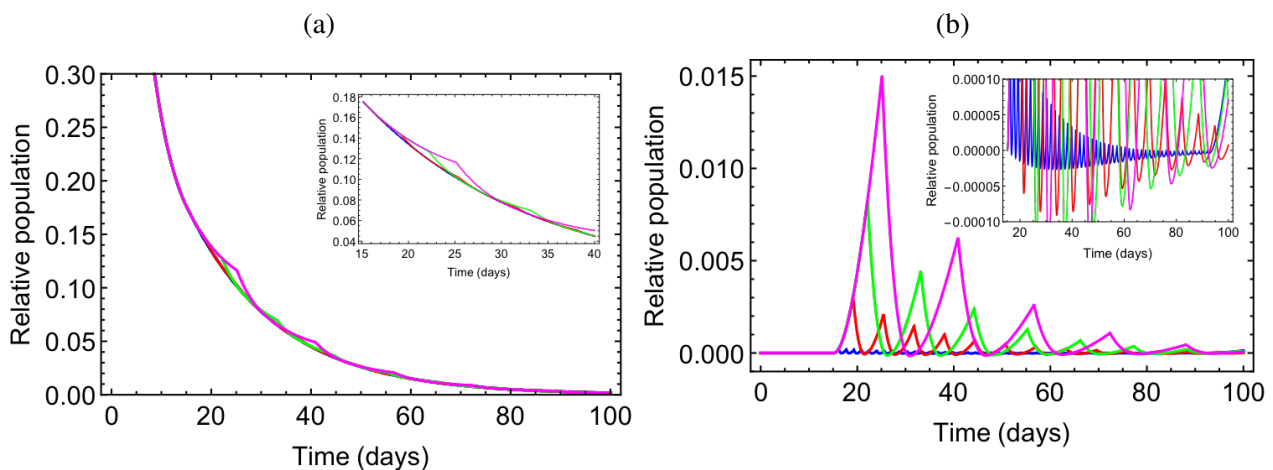

Figure 16: Graphs of regular drug switch in Stage 2 with different  $\{\Delta t, k(\Delta t, p_A, p_B)\}$ :  $\Delta t = 1$  day (blue),  $\Delta t = 4$  days (red),  $\Delta t = 7$  days (green), and  $\Delta t = 10$  days (magenta). Parameters/conditions:  $p_A = \{-0.18, 0.008, 0.00075\}/\text{day}$ ,  $p_B = \{-0.9, 0.016, 0.00125\}/\text{day}$  and  $\{A_R^0, B_R^0\} = \{0.1, 0.9\}$  (a) Time histories of total populations,  $C_P^n$  for  $n \in \{1, 4, 7, 10\}$  days (b) Differences between the optimal population history  $C_P^*$ , (i.e., when  $\Delta t = 0$ ) and each cases with positive  $\Delta t$ . (i.e.,  $C_P^n - C_P^*$ ). The inside smaller plots are same types of graphs with the bigger graphs, and show enlargement of interesting ranges.

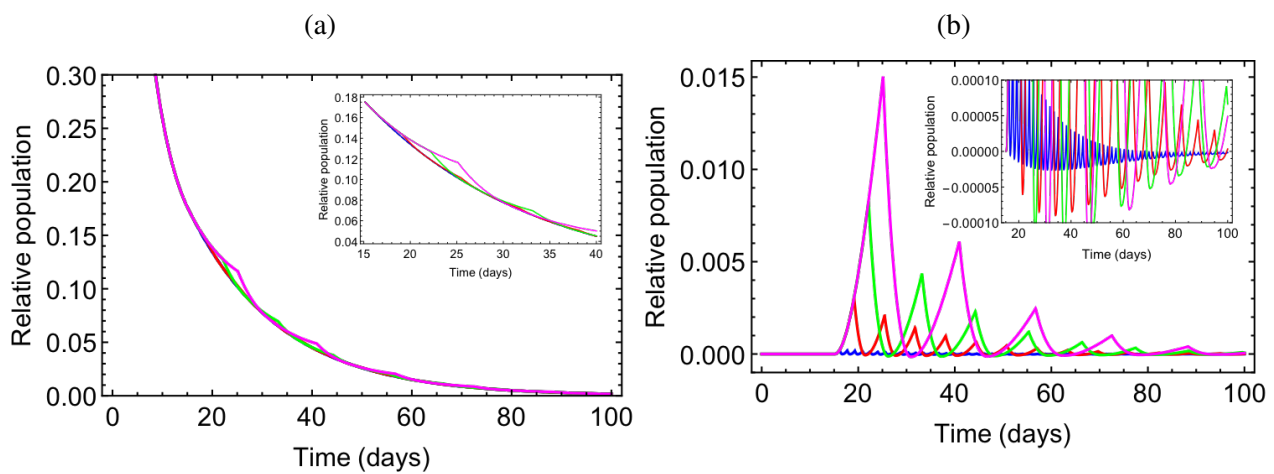

Figure 17: Graphs of regular drug switch in Stage 2 with different  $\{\Delta t\}$  and fixed  $k^*$  from 10:  $\Delta t = 1$  day (blue),  $\Delta t = 4$  days (red),  $\Delta t = 7$  days (green), and  $\Delta t = 10$  days (magenta). Parameters/conditions:  $p_A = \{-0.18, 0.008, 0.00075\}$ /day,  $p_B = \{-0.9, 0.016, 0.00125\}$ /day and  $\{A_R^0, B_R^0\} = \{0.1, 0.9\}$  (a) Time histories of total populations,  $C_P^n$  for  $n \in \{1, 4, 7, 10\}$  days (b) Differences between the optimal population history  $C_P^*$ , (i.e., when  $\Delta t = 0$ ) and each cases with positive  $\Delta t$ . (i.e.,  $C_P^n - C_P^*$ ). The inside smaller plots are same types of graphs with the bigger graphs, and show enlargement of interesting ranges.
